# Supplementary material for: On the Fate of Butyl Methoxydibenzoylmethane (Avobenzone) in Coral Tissue and Its Effect on Coral Metabolome
Source: MDPI journal article supplement (doi:10.3390/metabo13040533), 2023-04-07
Supplement: s1 [file s1]

Supporting Information for:

**On the fate of butyl methoxydibenzoylmethane (avobenzone) in coral tissue and its effect on coral metabolome**

Fanny Clergeaud<sup>1</sup>, Maeva Giraudo<sup>1</sup>, Alice M. S. Rodrigues<sup>1,2</sup>, Evane Thorel<sup>1</sup>, Philippe Lebaron<sup>1</sup>, Didier Stien<sup>1,\*</sup>

**Table of Content**

|                                                                                                                                                                                                                      |    |
|----------------------------------------------------------------------------------------------------------------------------------------------------------------------------------------------------------------------|----|
| Full experimental details.....                                                                                                                                                                                       | 4  |
| Table S1. ECOSAR v2.2 predicted toxicity of BM derivatives compared to BM (1).....                                                                                                                                   | 5  |
| Figure S1. Proposed structure of compound 2.....                                                                                                                                                                     | 6  |
| Figure S2. ESI <sup>+</sup> -MS spectrum showing ion [2+Na] <sup>+</sup> at <i>m/z</i> 619.3762, with expansion on the right.....                                                                                    | 6  |
| Figure S3. Collision-induced fragmentation spectrum of [2+Na] <sup>+</sup> at <i>m/z</i> 619.3762.....                                                                                                               | 6  |
| Figure S4. Proposed structure of compound 3.....                                                                                                                                                                     | 6  |
| Figure S5. ESI <sup>+</sup> -MS spectrum showing ion [3+Na] <sup>+</sup> at <i>m/z</i> 595.3758.....                                                                                                                 | 7  |
| Figure S6. Collision-induced fragmentation spectrum of [3+Na] <sup>+</sup> at <i>m/z</i> 595.3758.....                                                                                                               | 7  |
| Figure S7. Proposed structure of compound 4.....                                                                                                                                                                     | 7  |
| Figure S8. ESI <sup>+</sup> -MS spectrum showing ion [4+Na] <sup>+</sup> at <i>m/z</i> 645.3916.....                                                                                                                 | 7  |
| Figure S9. Collision-induced fragmentation spectrum of [4+Na] <sup>+</sup> at <i>m/z</i> 645.3916.....                                                                                                               | 7  |
| Figure S10. Proposed structure of compound 5.....                                                                                                                                                                    | 8  |
| Figure S11. ESI <sup>+</sup> -MS spectrum showing ion [5+Na] <sup>+</sup> at <i>m/z</i> 621.3916.....                                                                                                                | 8  |
| Figure S12. Collision-induced fragmentation spectrum of [5+Na] <sup>+</sup> at <i>m/z</i> 621.3916.....                                                                                                              | 8  |
| Figure S13. Proposed structure of compound 6.....                                                                                                                                                                    | 8  |
| Figure S14. ESI <sup>+</sup> -MS spectrum showing ion [6+Na] <sup>+</sup> at <i>m/z</i> 623.4072.....                                                                                                                | 8  |
| Figure S15. Collision-induced fragmentation spectrum of [6+Na] <sup>+</sup> at <i>m/z</i> 623.4072.....                                                                                                              | 9  |
| Figure S16. Proposed structure of compound 7.....                                                                                                                                                                    | 9  |
| Figure S17. ESI <sup>+</sup> -MS spectrum showing ion [7+Na] <sup>+</sup> at <i>m/z</i> 573.3916.....                                                                                                                | 9  |
| Figure S18. Collision-induced fragmentation spectrum of [7+Na] <sup>+</sup> at <i>m/z</i> 573.3916.....                                                                                                              | 9  |
| Figure S19. Compared extracted ion chromatograms at <i>m/z</i> 573.3914 ([7+Na] <sup>+</sup> ) in an extract of BM-exposed coral (top) and synthetic analytical standard of compound 7 (bottom).....                 | 10 |
| Figure S20. Compared collision-induced fragmentation spectra of [7+Na] <sup>+</sup> ion at <i>m/z</i> 573.3914 in an extract of BM-exposed coral (top) and synthetic analytical standard of compound 7 (bottom)..... | 10 |
| Figure S21. Proposed structure of compound 8.....                                                                                                                                                                    | 10 |
| Figure S22. ESI <sup>+</sup> -MS spectrum showing ion [8+Na] <sup>+</sup> at <i>m/z</i> 573.3916.....                                                                                                                | 11 |
| Figure S23. Collision-induced fragmentation spectrum of [8+Na] <sup>+</sup> at <i>m/z</i> 573.3916.....                                                                                                              | 11 |
| Figure S24. Proposed structure of compound 9.....                                                                                                                                                                    | 11 |
| Figure S25. ESI <sup>+</sup> -MS spectrum showing ion [9+Na] <sup>+</sup> at <i>m/z</i> 599.4071.....                                                                                                                | 11 |
| Figure S26. Collision-induced fragmentation spectrum of [9+Na] <sup>+</sup> at <i>m/z</i> 599.4071.....                                                                                                              | 12 |
| Figure S27. Proposed structure of compound 10.....                                                                                                                                                                   | 12 |
| Figure S28. ESI <sup>+</sup> -MS spectrum showing ion [10+Na] <sup>+</sup> at <i>m/z</i> 601.4229.....                                                                                                               | 12 |
| Figure S29. Collision-induced fragmentation spectrum of [10+Na] <sup>+</sup> at <i>m/z</i> 601.4229.....                                                                                                             | 12 |
| Figure S30. Proposed structure of compound 11.....                                                                                                                                                                   | 12 |

|                                                                                                                                                                                                                                             |    |
|---------------------------------------------------------------------------------------------------------------------------------------------------------------------------------------------------------------------------------------------|----|
| Figure S31. ESI <sup>+</sup> -MS spectrum showing ion [11+Na] <sup>+</sup> at <i>m/z</i> 589.3864.....                                                                                                                                      | 13 |
| Figure S32. Collision-induced fragmentation spectrum of [11+Na] <sup>+</sup> at <i>m/z</i> 589.3864 .....                                                                                                                                   | 13 |
| Figure S33. Proposed structure of compound 12.....                                                                                                                                                                                          | 13 |
| Figure S34. ESI <sup>+</sup> -MS spectrum showing ion [12+Na] <sup>+</sup> at <i>m/z</i> 655.3033.....                                                                                                                                      | 13 |
| Figure S35. Collision-induced fragmentation spectrum of [12+Na] <sup>+</sup> at <i>m/z</i> 655.3033 .....                                                                                                                                   | 14 |
| Figure S36. Proposed structure of compound 13.....                                                                                                                                                                                          | 14 |
| Figure S37. ESI <sup>+</sup> -MS spectrum showing ion [13+Na] <sup>+</sup> at <i>m/z</i> 655.3034.....                                                                                                                                      | 14 |
| Figure S38. Collision-induced fragmentation spectrum of [13+Na] <sup>+</sup> at <i>m/z</i> 655.3034 .....                                                                                                                                   | 14 |
| Figure S39. Collision-induced fragmentation spectrum of Frag. 1 at <i>m/z</i> 311.1643.....                                                                                                                                                 | 15 |
| Figure S40. Collision-induced fragmentation spectrum of Frag. 2 at <i>m/z</i> 323.1643.....                                                                                                                                                 | 15 |
| Figure S41. ESI <sup>+</sup> -MS spectrum showing the undetermined ion at <i>m/z</i> 449.1370<br>corresponding to compound 14 .....                                                                                                         | 15 |
| Figure S42. Collision-induced fragmentation spectrum of ion at <i>m/z</i> 449.1370 .....                                                                                                                                                    | 15 |
| Figure S43. ESI <sup>+</sup> -MS spectrum showing ion [15+H] <sup>+</sup> at <i>m/z</i> 283.1694.....                                                                                                                                       | 16 |
| Figure S44. Collision-induced fragmentation spectrum of [15+H] <sup>+</sup> at <i>m/z</i> 283.1694 .....                                                                                                                                    | 16 |
| Figure S45. ESI <sup>+</sup> -MS spectrum showing ion [16+Na] <sup>+</sup> at <i>m/z</i> 559.3760.....                                                                                                                                      | 16 |
| Figure S46. Collision-induced fragmentation spectrum of [16+Na] <sup>+</sup> at <i>m/z</i> 559.3760.....                                                                                                                                    | 16 |
| Figure S47. ESI <sup>+</sup> -MS spectrum showing ion [17+H] <sup>+</sup> at <i>m/z</i> 279.1744.....                                                                                                                                       | 17 |
| Figure S48. Collision-induced fragmentation spectrum of [17+H] <sup>+</sup> at <i>m/z</i> 279.1744 .....                                                                                                                                    | 17 |
| Table S2. Compared ESI <sup>+</sup> -MS response of [BM+H] <sup>+</sup> and [7+Na] <sup>+</sup> ions, full data.....                                                                                                                        | 17 |
| Figure S49. Compared ESI <sup>+</sup> -MS response of [BM+H] <sup>+</sup> and [7+Na] <sup>+</sup> ions in the range of<br>concentration for which the response is linear .....                                                              | 18 |
| Table S3. Extracted ion chromatogram peak areas for compounds 1-11 in coral exposed to<br>BM (data provided by Compound Discoverer), corrected peak areas to report on mass<br>relative proportions, and relative corrected peak areas..... | 19 |
| Figure S50. ESI <sup>+</sup> -MS spectrum showing ion [18+H] <sup>+</sup> at <i>m/z</i> 548.4674.....                                                                                                                                       | 20 |
| Figure S51. Collision-induced fragmentation spectrum of [18+H] <sup>+</sup> at <i>m/z</i> 548.4674 .....                                                                                                                                    | 20 |
| Figure S52. ESI <sup>+</sup> -MS spectrum showing ion [19+H] <sup>+</sup> at <i>m/z</i> 562.4830.....                                                                                                                                       | 20 |
| Figure S53. Collision-induced fragmentation spectrum of [19+H] <sup>+</sup> at <i>m/z</i> 562.4830 .....                                                                                                                                    | 20 |
| Figure S54. ESI <sup>+</sup> -MS spectrum showing ion [20+H] <sup>+</sup> at <i>m/z</i> 550.4832.....                                                                                                                                       | 21 |
| Figure S55. Collision-induced fragmentation spectrum of [20+H] <sup>+</sup> at <i>m/z</i> 550.4832 .....                                                                                                                                    | 21 |
| Figure S56. ESI <sup>+</sup> -MS spectrum showing ion [21+H] <sup>+</sup> at <i>m/z</i> 870.5731.....                                                                                                                                       | 21 |
| Figure S57. Collision-induced fragmentation spectrum of [21+H] <sup>+</sup> at <i>m/z</i> 870.5731 .....                                                                                                                                    | 21 |
| Figure S58. ESI <sup>+</sup> -MS spectrum showing ion [22+H] <sup>+</sup> at <i>m/z</i> 798.5731.....                                                                                                                                       | 22 |
| Figure S59. Collision-induced fragmentation spectrum of [22+H] <sup>+</sup> at <i>m/z</i> 798.5731 .....                                                                                                                                    | 22 |
| Figure S60. Proposed structure of compound 23.....                                                                                                                                                                                          | 22 |
| Figure S61. ESI <sup>+</sup> -MS spectrum showing ion [23+Na] <sup>+</sup> at <i>m/z</i> 789.4553.....                                                                                                                                      | 22 |
| Figure S62. Collision-induced fragmentation spectrum of [23+Na] <sup>+</sup> at <i>m/z</i> 789.4553 .....                                                                                                                                   | 23 |
| Figure S63. Proposed structure of compound 24.....                                                                                                                                                                                          | 23 |
| Figure S64. ESI <sup>+</sup> -MS spectrum showing ion [24+Na] <sup>+</sup> at <i>m/z</i> 791.4709.....                                                                                                                                      | 23 |
| Figure S65. Collision-induced fragmentation spectrum of [24+Na] <sup>+</sup> at <i>m/z</i> 791.4709 .....                                                                                                                                   | 23 |
| Figure S66. Proposed structure of compound 25.....                                                                                                                                                                                          | 24 |
| Figure S67. ESI <sup>+</sup> -MS spectrum showing ion [25+Na] <sup>+</sup> at <i>m/z</i> 817.4853.....                                                                                                                                      | 24 |
| Figure S68. Collision-induced fragmentation spectrum of [25+Na] <sup>+</sup> at <i>m/z</i> 817.4866 .....                                                                                                                                   | 24 |
| Figure S69. Proposed structure of compound 26.....                                                                                                                                                                                          | 24 |
| Figure S70. ESI <sup>+</sup> -MS spectrum showing ion [26+Na] <sup>+</sup> at <i>m/z</i> 769.4871.....                                                                                                                                      | 25 |
| Figure S71. Collision-induced fragmentation spectrum of [26+Na] <sup>+</sup> at <i>m/z</i> 769.4871 .....                                                                                                                                   | 25 |

|                                                                                                                          |    |
|--------------------------------------------------------------------------------------------------------------------------|----|
| Figure S72. Proposed structure of compound 27 .....                                                                      | 25 |
| Figure S73. ESI <sup>+</sup> -MS spectrum showing ion [27+Na] <sup>+</sup> at <i>m/z</i> 771.5025.....                   | 25 |
| Figure S74. Collision-induced fragmentation spectrum of [27+Na] <sup>+</sup> at <i>m/z</i> 771.5025 .....                | 26 |
| Figure S75. ESI <sup>+</sup> -MS spectrum showing ion [28+H] <sup>+</sup> at <i>m/z</i> 613.3521.....                    | 26 |
| Figure S76. Collision-induced fragmentation spectrum of [28+H] <sup>+</sup> at <i>m/z</i> 613.3521 .....                 | 26 |
| Figure S77. ESI <sup>+</sup> -MS spectrum showing ion [29+H] <sup>+</sup> at <i>m/z</i> 613.3525.....                    | 26 |
| Figure S78. Collision-induced fragmentation spectrum of [29+H] <sup>+</sup> at <i>m/z</i> 613.3521 .....                 | 27 |
| Figure S79. ESI <sup>+</sup> -MS spectrum showing ion [30+NH <sub>4</sub> ] <sup>+</sup> at <i>m/z</i> 1070.6836.....    | 27 |
| Figure S80. Collision-induced fragmentation spectrum of [30+NH <sub>4</sub> ] <sup>+</sup> at <i>m/z</i> 1070.6836 ..... | 27 |

## Full experimental details

**Pocillopora damicornis.** Samples of the coral *P. damicornis* were collected in Oman and were acclimated for more than one year in tanks at the Banyuls Oceanological Observatory. Corals were maintained in artificial seawater (ASW) prepared with reverse osmosis purified water and Reef Salt SeaChem salts. Salinity was adjusted to 36 g/L, pH = 8, and the temperature was set at 24 °C. All experiments were conducted with the same ASW.

**Preparation of Coral for Exposition to Solar Filters.** Coral pieces (1–1.5 cm) were cut from branch tips from the same mother colony. Each piece was attached to a fishing line, and the coral pieces were then suspended each on one ~5–6 cm plastic grid, making sure the lines had the appropriate length so that the coral pieces will stand in the middle of exposure beakers during the assay. Each suspended coral nubbin (five replicates) was clamped to grid above the aquarium of origin, thereby immersing the pieces. The suspended pieces were acclimatized for approximately 1 month before the assay to allow for full healing.

**Exposure Setup.** Beakers (250 mL) were filled with ASW (200 mL). BM ( $\geq 98.0\%$ , Sigma-Aldrich) was dissolved in DMSO at concentrations of 400, 120, 20, and 2  $\mu\text{g/mL}$ . Each of these solutions (500  $\mu\text{L}$ ) was added into separate beakers, resulting in final concentrations of 1000, 300, 50, and 5  $\mu\text{g/L}$ . DMSO (500  $\mu\text{L}$ ) was used as a negative control, and the DMSO concentration was 0.25% v/v in all beakers. The suspended coral pieces were dipped into the beakers, with the grid positioning the pieces halfway into the water. Gentle bubbling in the beakers was maintained using aquarium air pumps equipped with a Teflon tubing with Pasteur pipettes tips. Homogeneous lighting was set to 250  $\mu\text{mol/m}^2/\text{s}$ , with a cycle of 10 h of day and 14 h of night. The corals were transferred every 24 h to a new beaker prepared in the same way. The total exposure lasted for 7 days. Pictures were taken every 24 h to monitor coral polyps. Coral exposure at 1000  $\mu\text{g/L}$  BM was repeated in a separate experiment to confirm the result.

**Extraction.** After 7 days, the coral pieces were collected and the fishing lines were removed with a scalpel. Each coral piece was placed into a 20 mL test tube, covered with MeOH/ acetonitrile 1/1, and sonicated for 20 min. Once the polyps were dissolved, the solvent was evaporated and the dry samples were kept at  $-80\text{ }^{\circ}\text{C}$  until analysis. All solvents used for extraction and profiling were LC-MS gradient grade (Biosolve, Dieuze, France).

**UHPLC-HRMS Profiling.** High-resolution MS/MS analyses were conducted with a Thermo UHPLC-HRMS system. Analyses were performed in the electrospray positive ionization mode in the range of 133.4–2000 Da in centroid mode. The mass detector was an Orbitrap MS/MS FT Q-Exactive focus mass spectrometer. The analyses were conducted in FullMS data dependent MS<sup>2</sup> mode. In FullMS, the resolution was set to 70000, and the AGC target was  $3 \times 10^6$ . In MS<sup>2</sup>, the resolution was 17500, AGC target  $10^5$ , isolation window 0.4 Da, and stepped normalized collision energy 15/30/45 was used, with 6 s dynamic exclusion. The lock mass option was set for ion at  $m/z$  144.98215, corresponding to  $\text{Cu}(\text{CH}_3\text{CN})^{2+}$ . The UHPLC column was a Phenomenex Luna Omega polar C-18 150 mm  $\times$  2.1 mm, 1.6  $\mu\text{m}$ . The column temperature was set to 42 °C, and the flow rate was 0.5 mL·min<sup>-1</sup>. The solvent system was a mixture of water (solution A) with increasing proportions of acetonitrile (solution B), both solvents modified with 0.1% formic acid. The gradient was as follows: 2%

B 3 min before injection, then from 1 to 13 min, a shark fin gradient increase of B up to 100% (curve 2), followed by 100% B for 5 min. The flow was diverted (not injected into the mass spectrometer) before injection, up to 1 min after injection. The coral extracts were dissolved in MeOH (1 mg/mL) by sonication, and 2  $\mu$ L was injected onto the column. Standard of sythetic palmitic acid dihydroBM ester (**7**) in acetonitrile (0.1  $\mu$ g/mL, 1  $\mu$ L injected) was analyzed with the same method.

**Metabolomic Analyses.** Profiles were analyzed with Compound Discoverer (CD) 2.1 (ThermoFisher, Villebon, France). Coral exposed to DMSO was used as the reference metabolome, and blank injections were used to remove irrelevant ion peaks (ion peak is considered only if the signal is at least 5 times more intense than in the blank). An untargeted metabolomic workflow was used. This workflow finds and identifies the differences between samples and performs retention time alignment, unknown compound detection, and compound grouping across all samples. The workflow predicts elemental compositions for all compounds, fills gaps across all samples, hides chemical background (using Blank samples), identifies compounds using mzCloud (ddMS<sup>2</sup>) and ChemSpider (formula or exact mass), performs similarity searches for all compounds with ddMS2 data using mzCloud, and calculates a differential analysis (t-test or ANOVA) and determines p values, adjusted p values, ratios, and fold change. The retention time window was set to 2–17 min. The maximum shift for alignment was 0.1 min, the maximum mass tolerance was 2 ppm and the minimum peak intensity was  $2 \times 10^6$ . Statistical analyses (Principal Component Analysis [PCA], volcano plots) were performed with CD using centered and scaled data.

**Predicted toxicity of BM derivatives compared to BM.** The prediction of BM derivatives toxicity in aquatic organisms was carried out using an ecological structure-activity relationships (ECOSAR) predictive model. This model estimates acute and chronic toxicity concentrations for aquatic organisms by analyzing chemical structure similarity, using data reported to USEPA. To accomplish this task, ECOSAR V 2.2 was utilized in the study, which is distributed by the EPA (<https://www.epa.gov/tsc-screening-tools/ecological-structure-activity-relationships-ecosar-predictive-model>). For acute toxicity, LC<sub>50</sub> values on green algae (EC<sub>50</sub> at 96 h), daphnids (LC<sub>50</sub> at 48 h), and fish (LC<sub>50</sub> at 96 h) were considered. ECOSAR also generated predicted chronic toxicity information (Chronic Value, ChV) using the geometric mean of the predicted lowest observed effect concentration (LOEC) and the predicted no observed effect concentration (NOEC). Results for compounds **1**, **4**, **7**, **11** and **12** and reported in Table S1.

**Table S1.** ECOSAR v2.2 predicted toxicity of BM derivatives compared to BM (**1**)

| Cmpd.     | Acute (mg/L)          |                       |                       | Chronic (mg/L)        |                       |                       |
|-----------|-----------------------|-----------------------|-----------------------|-----------------------|-----------------------|-----------------------|
|           | Fish                  | Daphnid               | Green Algae           | Fish                  | Daphnid               | Green Algae           |
| <b>1</b>  | 0.64                  | 0.71                  | 0.26                  | 0.036                 | 0.034                 | 0.16                  |
| <b>4</b>  | $5.2 \times 10^{-06}$ | $5.1 \times 10^{-06}$ | $2.7 \times 10^{-07}$ | $1.4 \times 10^{-06}$ | $5.6 \times 10^{-06}$ | $2.5 \times 10^{-07}$ |
| <b>7</b>  | $4.6 \times 10^{-05}$ | $5.1 \times 10^{-05}$ | $3.7 \times 10^{-06}$ | $1.0 \times 10^{-05}$ | $4.2 \times 10^{-05}$ | $2.9 \times 10^{-06}$ |
| <b>11</b> | $4.0 \times 10^{-04}$ | $5.0 \times 10^{-04}$ | $4.9 \times 10^{-05}$ | $7.3 \times 10^{-05}$ | $3.1 \times 10^{-04}$ | $3.3 \times 10^{-05}$ |
| <b>12</b> | 0.0026                | 0.0051                | 0.0039                | $8.6 \times 10^{-05}$ | $2.7 \times 10^{-04}$ | 0.0055                |

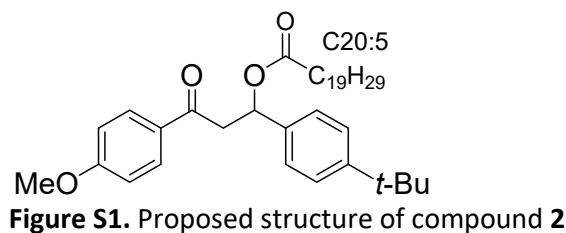

BM\_1mg\_R3 #3222 RT: 13.18 AV: 1 NL: 1.48E+007  
T: FTMS + c ESI Full lock ms [133.4000-2000.0000]

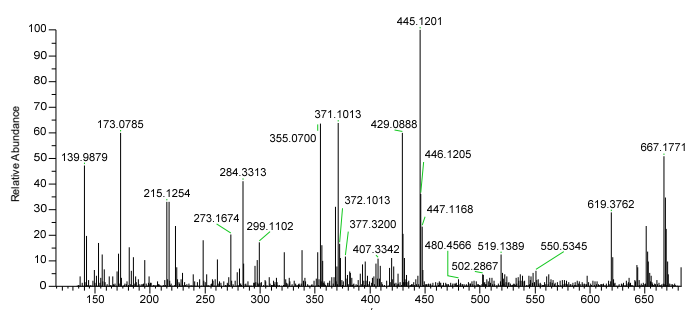

BM\_1mg\_R3 #3222 RT: 13.18 AV: 1 NL: 4.29E+006  
T: FTMS + c ESI Full lock ms [133.4000-2000.0000]

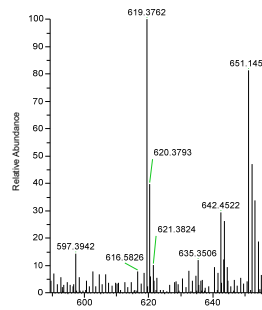

**Figure S2.** ESI<sup>+</sup>-MS spectrum showing ion [2+Na]<sup>+</sup> at *m/z* 619.3762, with expansion on the right

Corail\_BM1000\_R5\_17-01-2019\_FulIMS-PRM\_#2195 RT: 12.47 AV: 1 NL: 5.85E+005  
T: FTMS + p ESI Full ms2 619.3758@hcd30.00 [50.0000-650.0000]

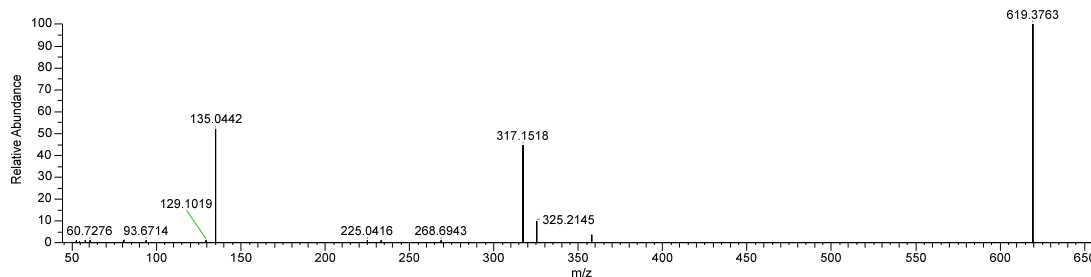

**Figure S3.** Collision-induced fragmentation spectrum of [2+Na]<sup>+</sup> at *m/z* 619.3762

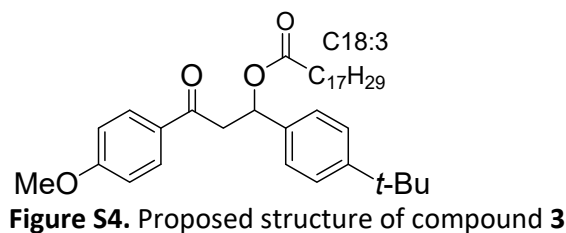

BM\_1mg\_R3 #3305-3320 RT: 13.46-13.51 AV: 8 SB: 9 13.43-13.46, 13.51-13.53 NL: 3.37E+006  
T: FTMS + c ESI Full lock ms [133.4000-2000.0000]

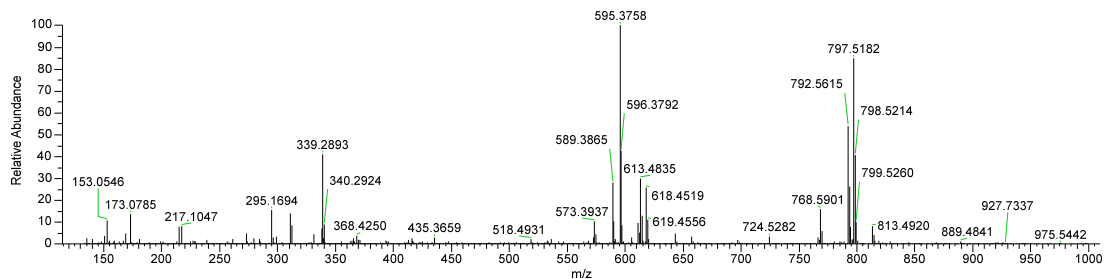

**Figure S5.** ESI<sup>+</sup>-MS spectrum showing ion [3+Na]<sup>+</sup> at  $m/z$  595.3758

BM\_1mg\_R3 #3313 RT: 13.49 AV: 1 NL: 5.54E+005  
T: FTMS + c ESI d Full ms2 595.3758@hcd30.00 [50.0000-625.0000]

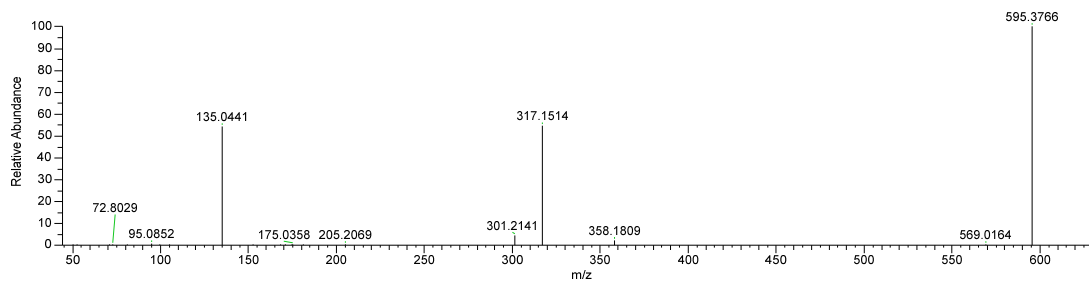

**Figure S6.** Collision-induced fragmentation spectrum of [3+Na]<sup>+</sup> at  $m/z$  595.3758

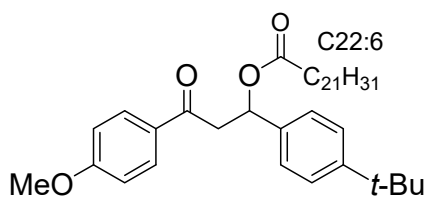

**Figure S7.** Proposed structure of compound 4

BM\_1mg\_R3 #3322-3340 RT: 13.52-13.58 AV: 10 SB: 13 13.45-13.51, 13.61-13.64 NL: 4.22E+006  
T: FTMS + c ESI d Full lock ms [133.4000-2000.0000]

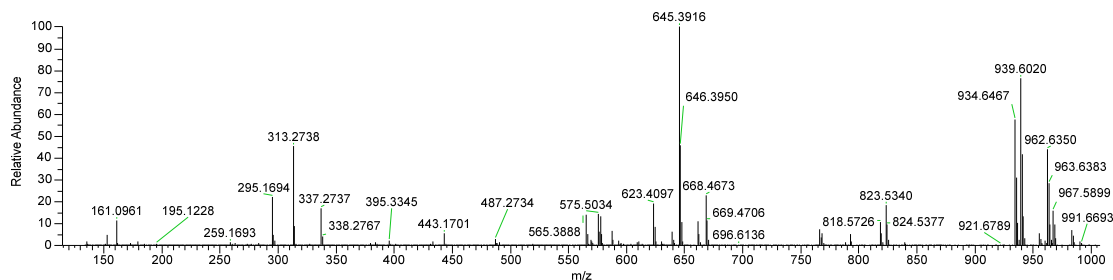

**Figure S8.** ESI<sup>+</sup>-MS spectrum showing ion [4+Na]<sup>+</sup> at  $m/z$  645.3916

BM\_1mg\_R3 #3329 RT: 13.54 AV: 1 NL: 3.00E+005  
T: FTMS + c ESI d Full ms2 645.3915@hcd30.00 [50.0000-675.0000]

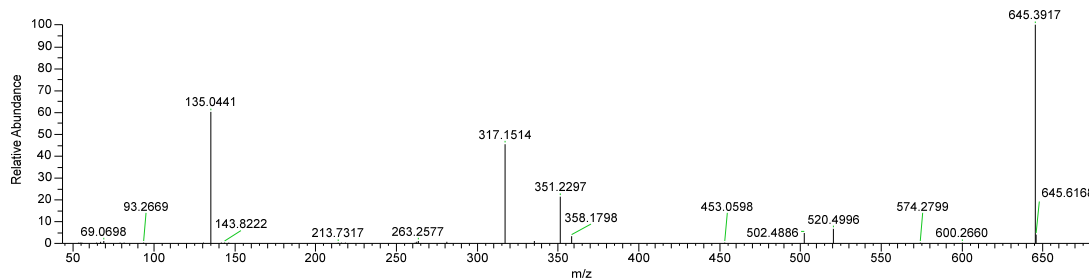

**Figure S9.** Collision-induced fragmentation spectrum of [4+Na]<sup>+</sup> at  $m/z$  645.3916

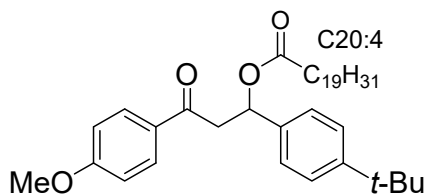

**Figure S10.** Proposed structure of compound 5

BM\_1mg\_R3 #3417-3435 RT: 13.84-13.9 AV: 9 SB: 10 13.95-13.99 , 13.80-13.83 NL: 6.65E+006  
T: FTMS + c ESI Full lock ms [133.4000-2000.0000]

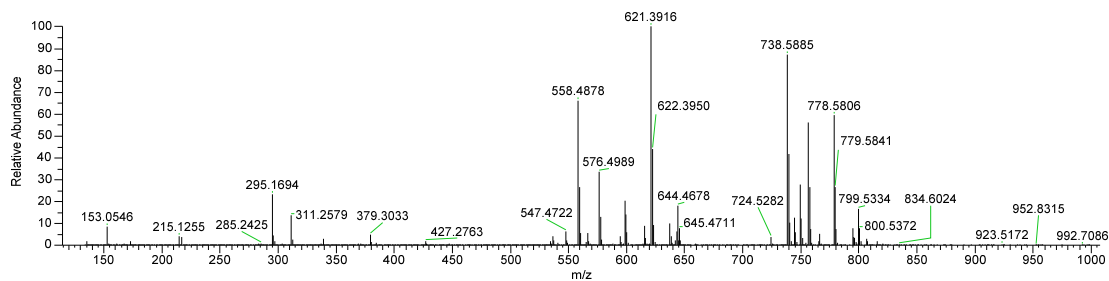

**Figure S11.** ESI<sup>+</sup>-MS spectrum showing ion [5+Na]<sup>+</sup> at *m/z* 621.3916

BM\_1mg\_R3 #3423 RT: 13.86 AV: 1 NL: 8.81E+005  
T: FTMS + c ESI d Full ms2 621.3917@hcd30.00 [50.0000-650.0000]

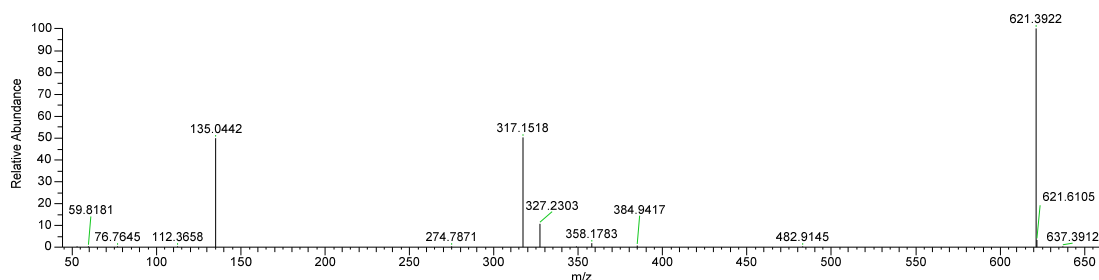

**Figure S12.** Collision-induced fragmentation spectrum of [5+Na]<sup>+</sup> at *m/z* 621.3916

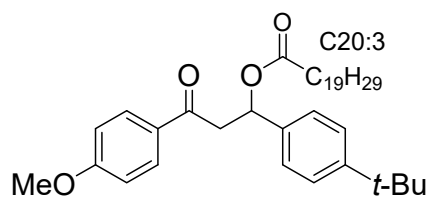

**Figure S13.** Proposed structure of compound 6

BM\_1mg\_R3 #3576-3594 RT: 14.38-14.44 AV: 10 SB: 10 14.36-14.38 , 14.49-14.52 NL: 5.49E+006  
T: FTMS + c ESI Full lock ms [133.4000-2000.0000]

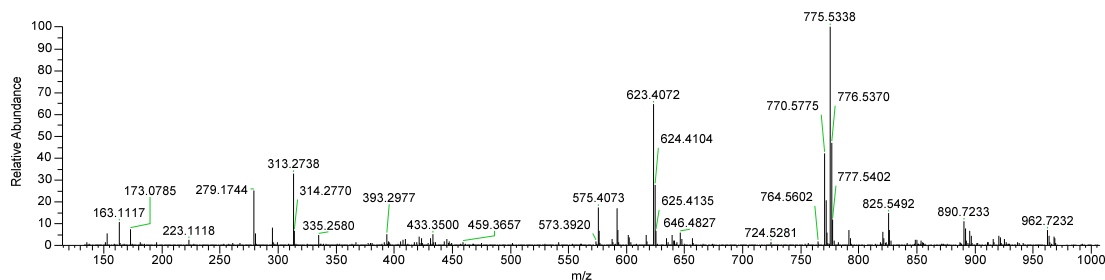

**Figure S14.** ESI<sup>+</sup>-MS spectrum showing ion [6+Na]<sup>+</sup> at *m/z* 623.4072



BM\_1mg\_R3 #3585 RT: 14.41 AV: 1 NL: 5.06E+005  
T: FTMS + c ESI d Full ms2 623.4072@hcd30.00 [50.0000-655.0000]

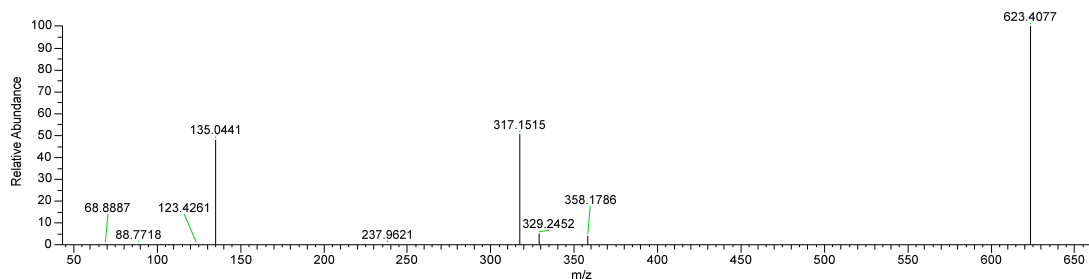

**Figure S15.** Collision-induced fragmentation spectrum of  $[6+Na]^+$  at  $m/z$  623.4072

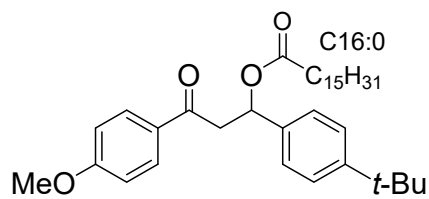

**Figure S16.** Proposed structure of compound 7

BM\_1mg\_R3 #3713-3728 RT: 14.84-14.89 AV: 8 SB: 7 14.81-14.84, 14.90-14.92 NL: 5.83E+007  
T: FTMS + c ESI Full lock ms [133.4000-2000.0000]

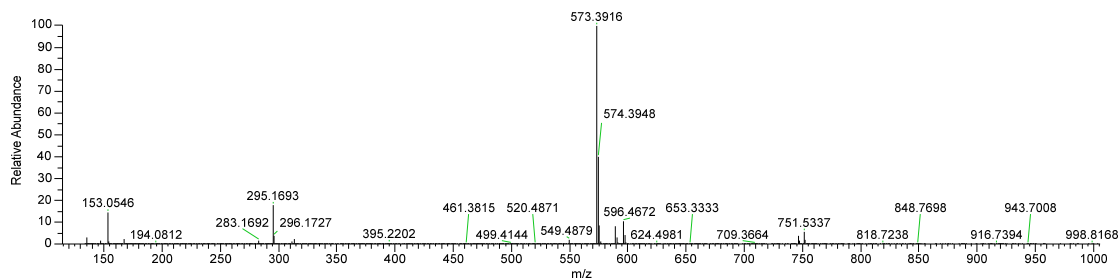

**Figure S17.** ESI<sup>+</sup>-MS spectrum showing ion  $[7+Na]^+$  at  $m/z$  573.3916

BM\_1mg\_R3 #3711 RT: 14.84 AV: 1 NL: 5.02E+005  
T: FTMS + c ESI d Full ms2 573.3914@hcd30.00 [50.0000-605.0000]

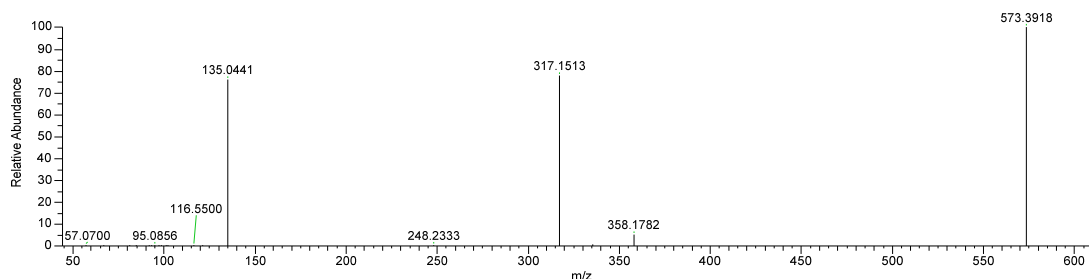

**Figure S18.** Collision-induced fragmentation spectrum of  $[7+Na]^+$  at  $m/z$  573.3916

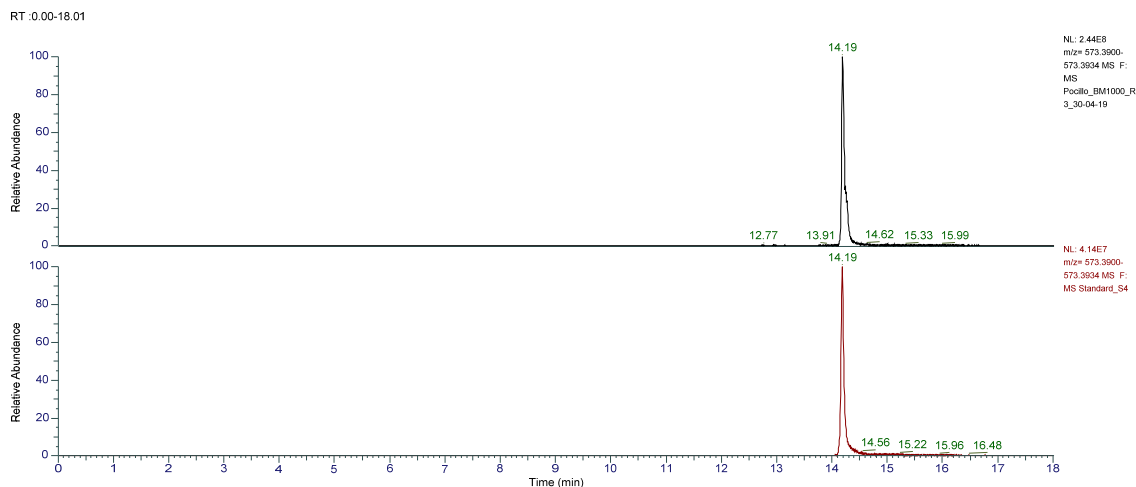

**Figure S19.** Compared extracted ion chromatograms at  $m/z$  573.3914 ( $[7+Na]^+$ ) in an extract of BM-exposed coral (top) and synthetic analytical standard of compound **7** (bottom)

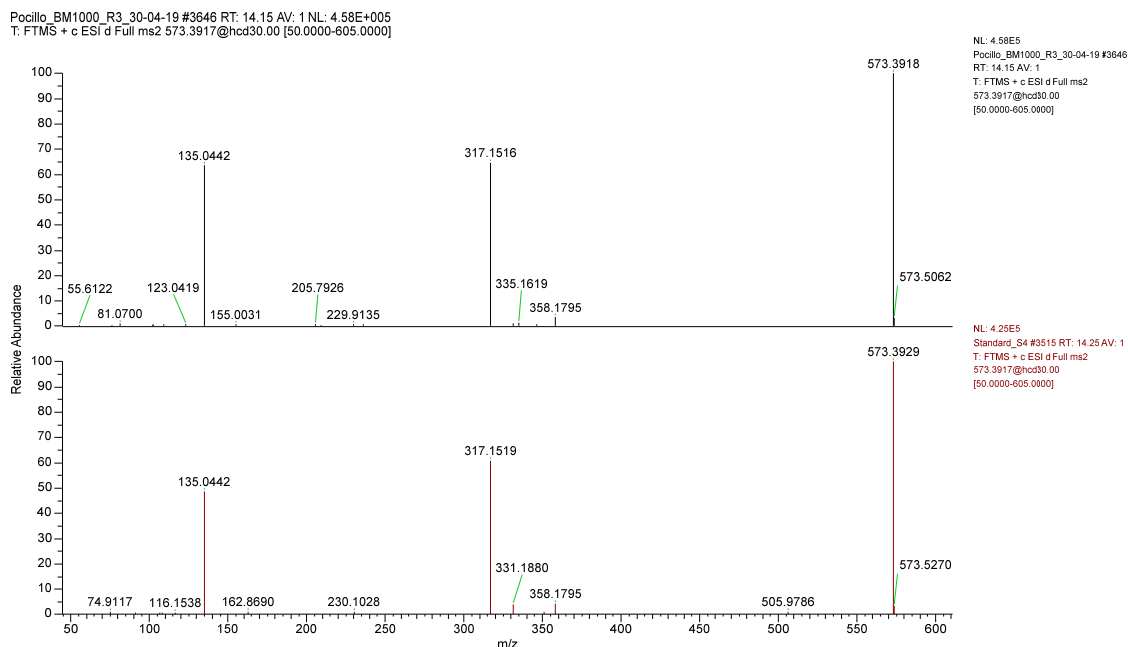

**Figure S20.** Compared collision-induced fragmentation spectra of  $[7+Na]^+$  ion at  $m/z$  573.3914 in an extract of BM-exposed coral (top) and synthetic analytical standard of compound **7** (bottom)

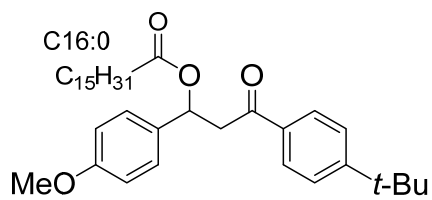

**Figure S21.** Proposed structure of compound **8**

BM\_1mg\_R3 #3737-3749 RT: 14.92-14.96 AV: 6 SB: 8 14.90-14.92 , 14.97-15.00 NL: 2.70E+007  
T: FTMS + c ESI Full lock ms [133.4000-2000.0000]

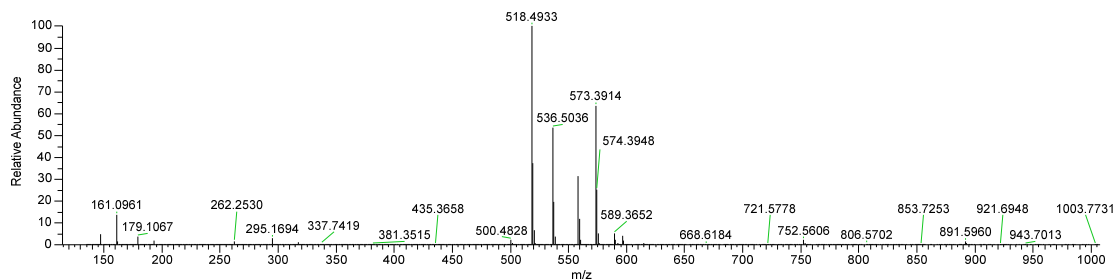

**Figure S22.** ESI<sup>+</sup>-MS spectrum showing ion [8+Na]<sup>+</sup> at  $m/z$  573.3916

Corail\_BM1000\_R5\_17-01-2019\_FulIMS-PRM\_#2598-2611 RT: 14.23-14.27 AV: 7 SB: 3 14.14-14.16 NL: 2.75E6  
T: FTMS + p ESI Full ms2 573.3914@hcd30.00 [50.0000-605.0000]

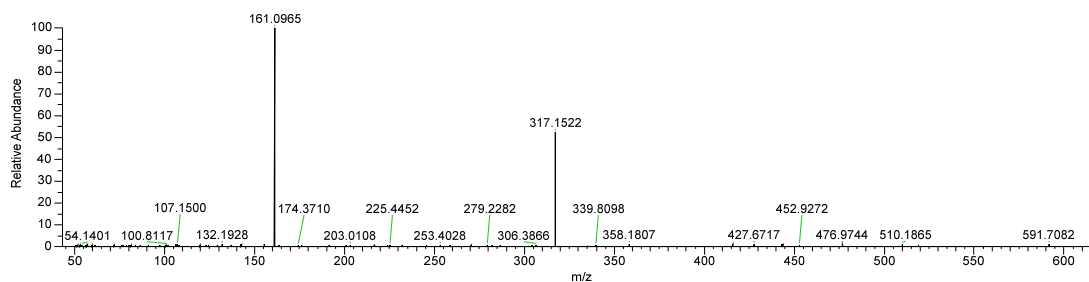

**Figure S23.** Collision-induced fragmentation spectrum of [8+Na]<sup>+</sup> at  $m/z$  573.3916

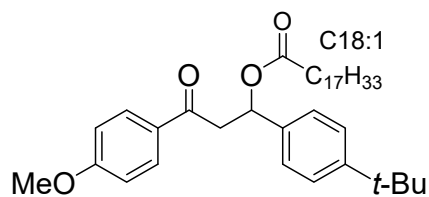

**Figure S24.** Proposed structure of compound 9

BM\_1mg\_R3 #3746-3761 RT: 14.95-15 AV: 8 SB: 8 15.00-15.02 , 14.92-14.94 NL: 7.53E+006  
T: FTMS + c ESI Full lock ms [133.4000-2000.0000]

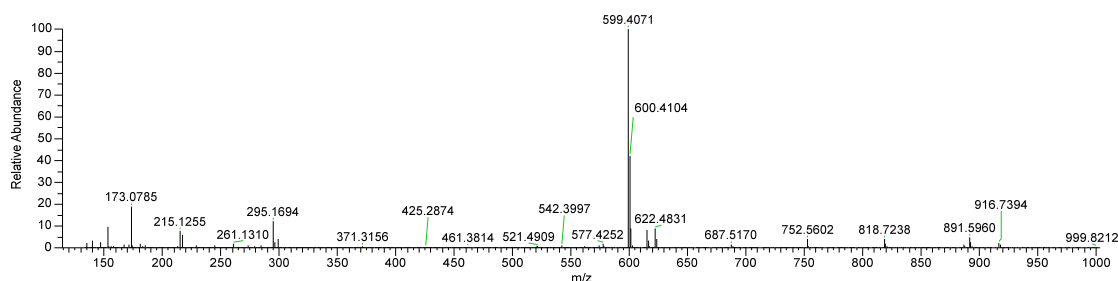

**Figure S25.** ESI<sup>+</sup>-MS spectrum showing ion [9+Na]<sup>+</sup> at  $m/z$  599.4071

BM\_1mg\_R3 #3751 RT: 14.97 AV: 1 NL: 9.35E+005  
T: FTMS + c ESI d Full ms2 599.4069@hcd30.00 [50.0000-630.0000]

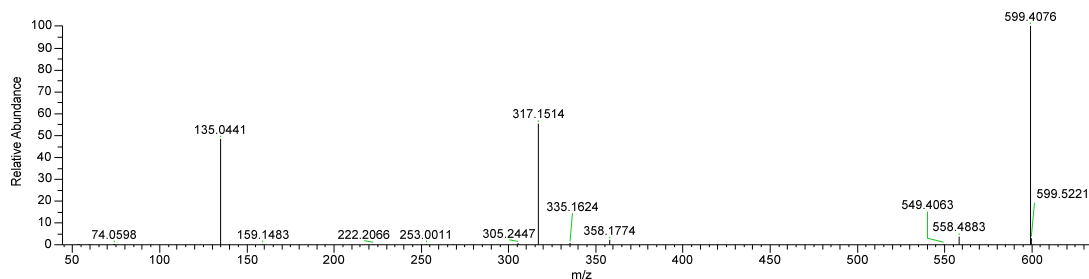

**Figure S26.** Collision-induced fragmentation spectrum of  $[9+Na]^+$  at  $m/z$  599.4071

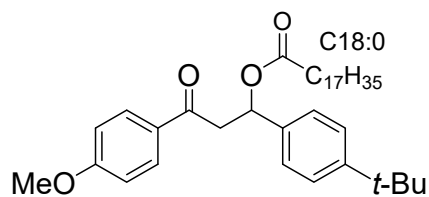

**Figure S27.** Proposed structure of compound **10**

BM\_1mg\_R3 #4017-4029 RT: 15.88-15.92 AV: 6 SB: 8 15.94-15.96, 15.86-15.88 NL: 8.93E+006  
T: FTMS + c ESI Full lock ms [133.4000-2000.0000]

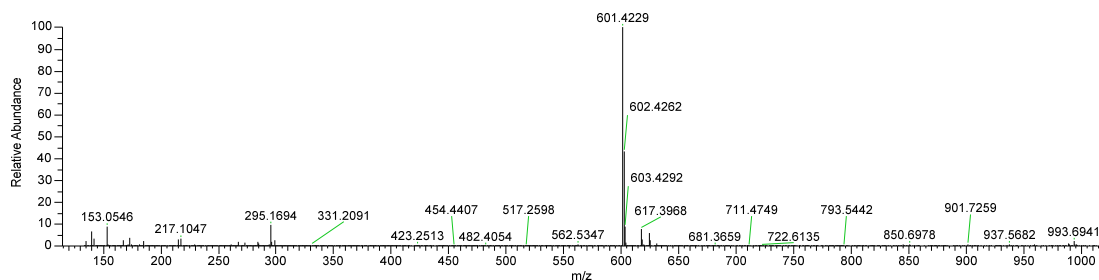

**Figure S28.** ESI<sup>+</sup>-MS spectrum showing ion  $[10+Na]^+$  at  $m/z$  601.4229

BM\_1mg\_R3 #4021 RT: 15.89 AV: 1 NL: 6.26E+005  
T: FTMS + c ESI d Full ms2 601.4229@hcd30.00 [50.0000-630.0000]

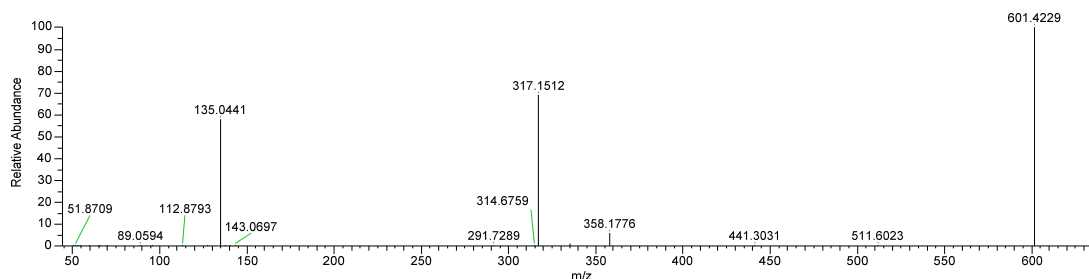

**Figure S29.** Collision-induced fragmentation spectrum of  $[10+Na]^+$  at  $m/z$  601.4229

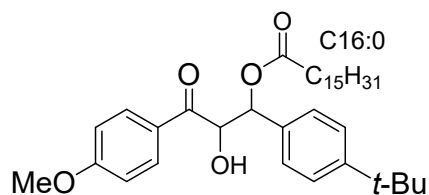

**Figure S30.** Proposed structure of compound **11**

BM\_1mg\_R3 #3094 RT: 12.74 AV: 1 SB: 20 12.67-12.73, 12.80-12.87 NL: 8.78E+006  
T: FTMS + c ESI Full lock ms [133.4000-2000.0000]

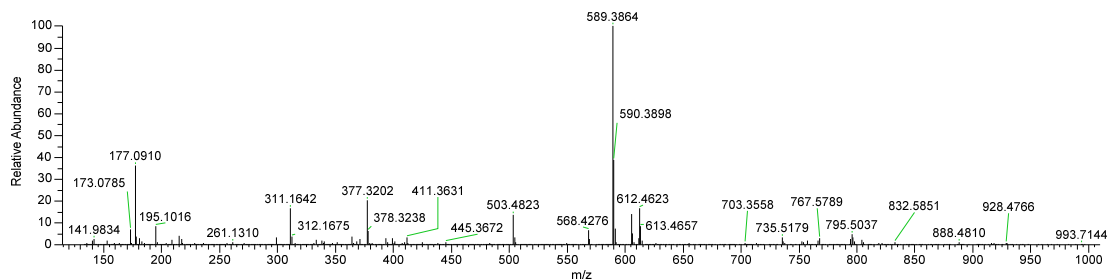

**Figure S31.** ESI<sup>+</sup>-MS spectrum showing ion [11+Na]<sup>+</sup> at  $m/z$  589.3864

BM\_1mg\_R3 #3095 RT: 12.75 AV: 1 NL: 1.09E+006  
T: FTMS + c ESI d Full ms2 589.3864@hcd30.00 [50.0000-620.0000]

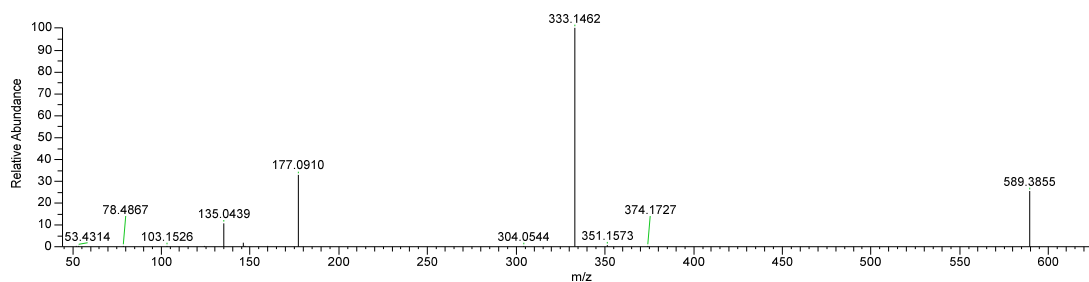

**Figure S32.** Collision-induced fragmentation spectrum of [11+Na]<sup>+</sup> at  $m/z$  589.3864

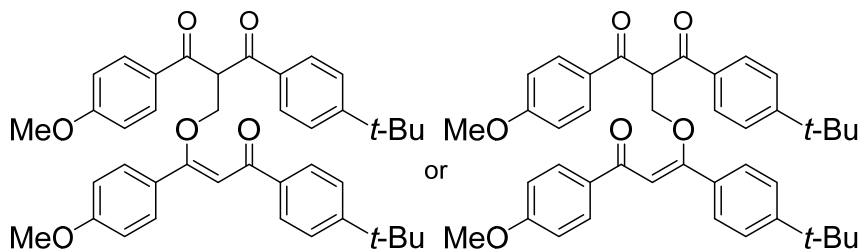

**Figure S33.** Proposed structure of compound **12**

BM\_1mg\_R3 #2388-2400 RT: 10.37-10.41 AV: 7 SB: 7 10.35-10.37, 10.41-10.43 NL: 1.17E+007  
T: FTMS + c ESI Full lock ms [133.4000-2000.0000]

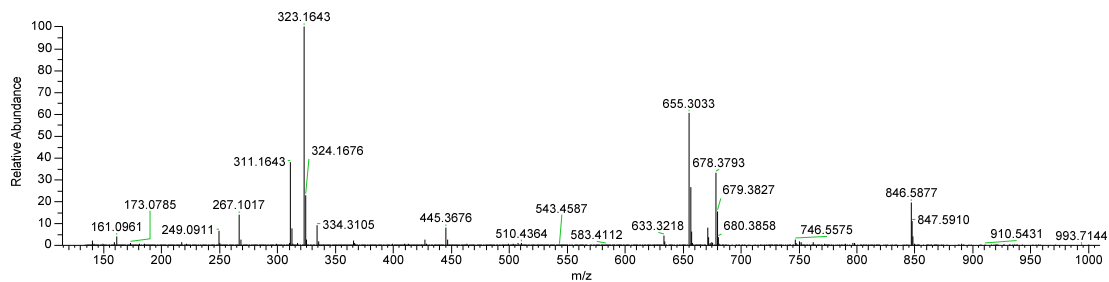

**Figure S34.** ESI<sup>+</sup>-MS spectrum showing ion [12+Na]<sup>+</sup> at  $m/z$  655.3033

BM\_1mg\_R3 #2393 RT: 10.39 AV: 1 NL: 1.49E+006  
T: FTMS + c ESI d Full ms2 655.3032@hcd30.00 [50.0000-685.0000]

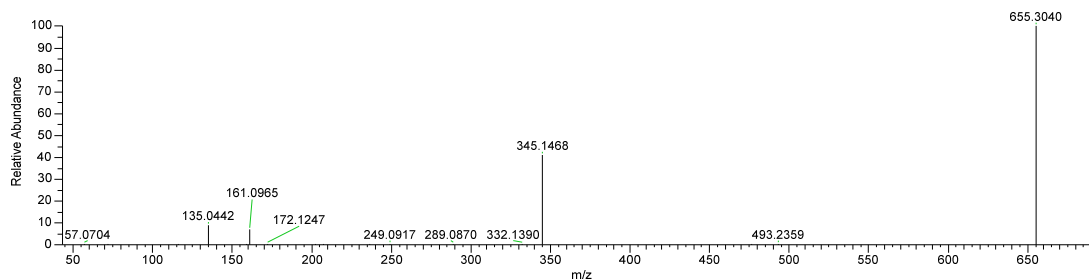

**Figure S35.** Collision-induced fragmentation spectrum of  $[12+Na]^+$  at  $m/z$  655.3033

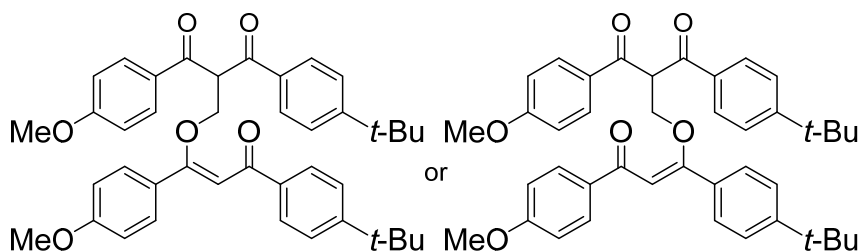

**Figure S36.** Proposed structure of compound **13**

BM\_1mg\_R3 #2411-2423 RT: 10.45-10.49 AV: 6 SB: 10 10.42-10.44 10.50-10.54 NL: 1.33E7  
T: FTMS + c ESI Full lock ms [133.4000-2000.0000]

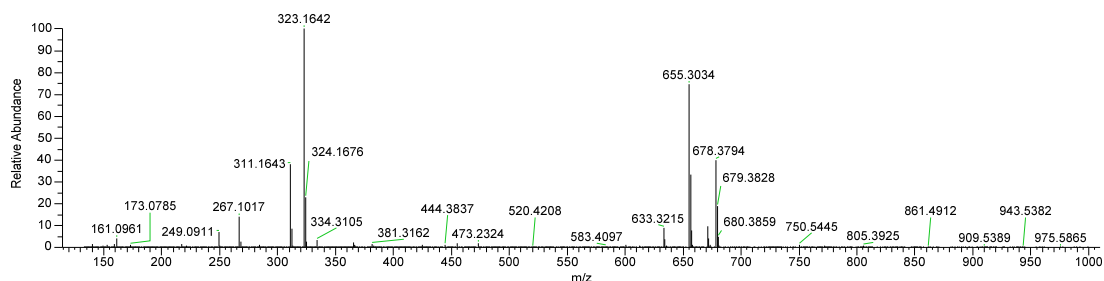

**Figure S37.** ESI<sup>+</sup>-MS spectrum showing ion  $[13+Na]^+$  at  $m/z$  655.3034

Corail\_BM1000\_R5\_17-01-2019\_FulIMS-PRM\_#1715 RT: 10.02 AV: 1 NL: 2.31E+005  
T: FTMS + p ESI Full ms2 655.3030@hcd30.00 [50.0000-685.0000]

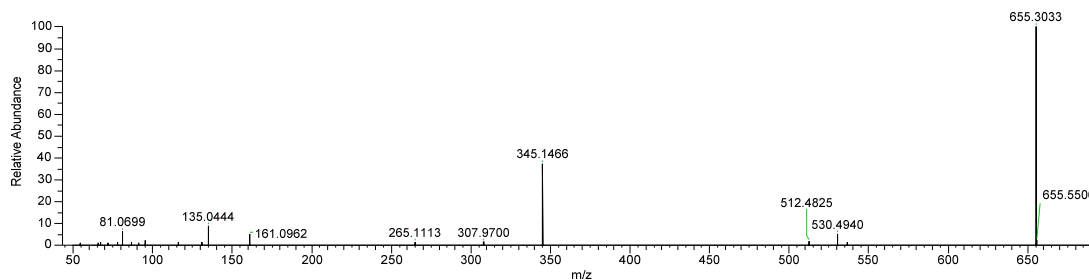

**Figure S38.** Collision-induced fragmentation spectrum of  $[13+Na]^+$  at  $m/z$  655.3034

BM\_1mg\_R3 #2397 RT: 10.40 AV: 1 NL: 6.83E+005  
T: FTMS + c ESI d Full ms2 311.1643@hcd30.00 [50.0000-335.0000]

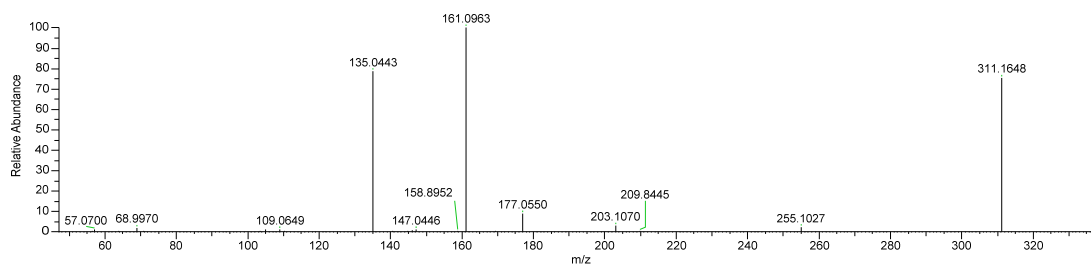

**Figure S39.** Collision-induced fragmentation spectrum of Frag. 1 at  $m/z$  311.1643

BM\_1mg\_R3 #2391 RT: 10.38 AV: 1 NL: 1.36E+006  
T: FTMS + c ESI d Full ms2 323.1643@hcd30.00 [50.0000-345.0000]

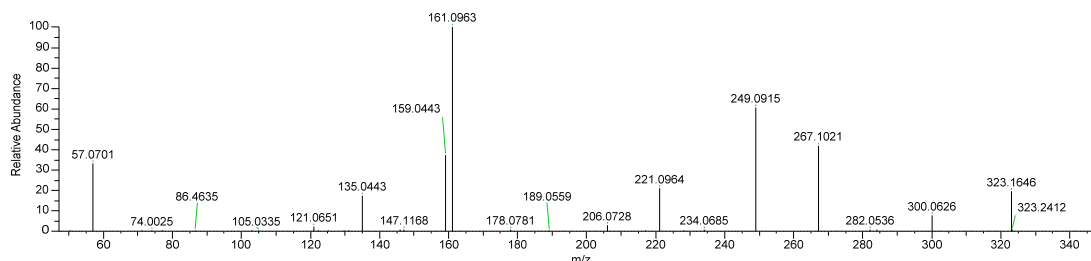

**Figure S40.** Collision-induced fragmentation spectrum of Frag. 2 at  $m/z$  323.1643

BM\_1mg\_R3 #2076 RT: 9.30 AV: 1 NL: 3.57E+008  
T: FTMS + c ESI Full lock ms [133.4000-2000.0000]

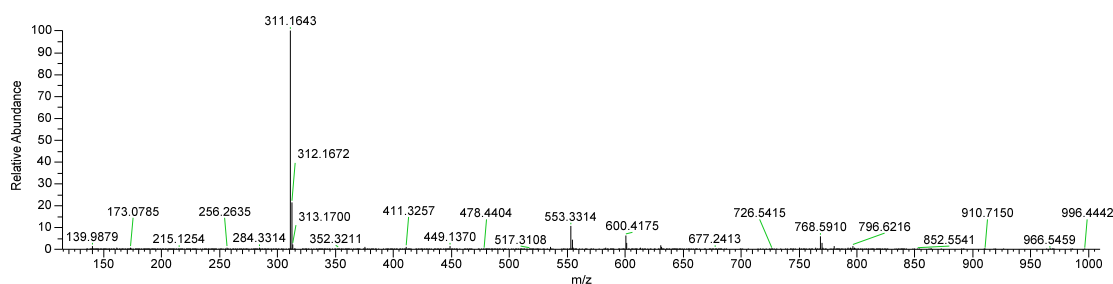

**Figure S41.** ESI<sup>+</sup>-MS spectrum showing the undetermined ion at  $m/z$  449.1370 corresponding to compound **14**

BM\_1mg\_R3 #2079 RT: 9.31 AV: 1 NL: 2.85E+005  
T: FTMS + c ESI d Full ms2 449.1370@hcd30.00 [50.0000-475.0000]

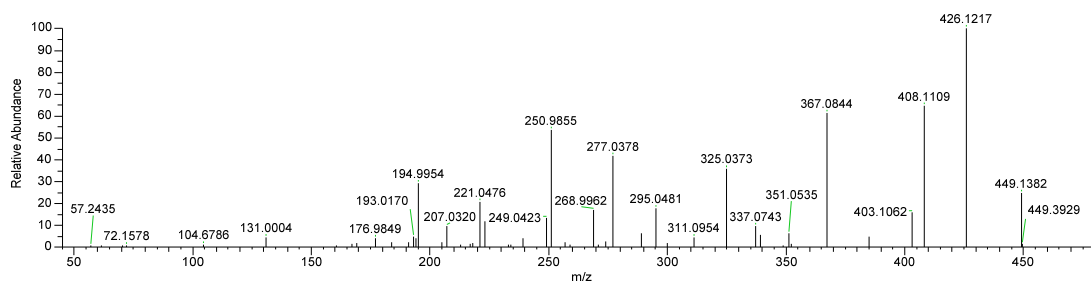

**Figure S42.** Collision-induced fragmentation spectrum of ion at  $m/z$  449.1370

BM\_1mg\_R3 #3364-3382 RT: 13.66-13.72 AV: 10 SB: 13 13.62-13.65 , 13.72-13.77 NL: 7.36E+006  
T: FTMS + c ESI Full lock ms [133.4000-2000.0000]

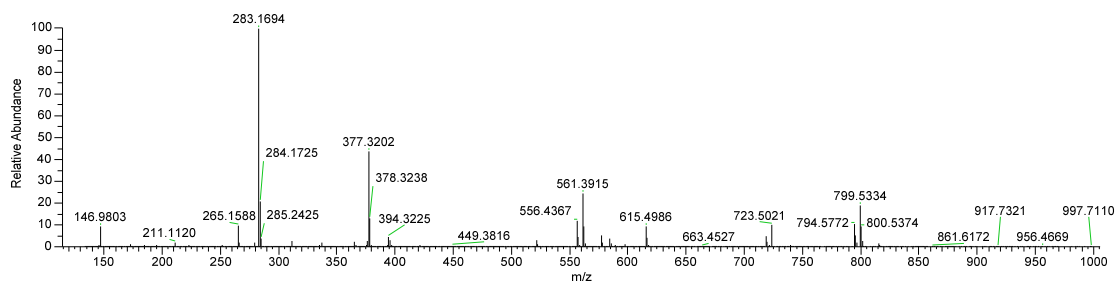

**Figure S43.** ESI<sup>+</sup>-MS spectrum showing ion [15+H]<sup>+</sup> at  $m/z$  283.1694

BM\_1mg\_R3 #3371 RT: 13.68 AV: 1 NL: 6.04E+005  
T: FTMS + c ESI d Full ms2 283.1694@hcd30.00 [50.0000-305.0000]

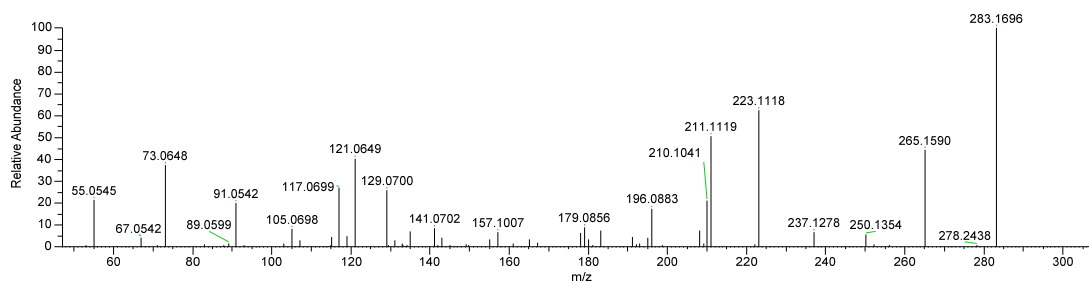

**Figure S44.** Collision-induced fragmentation spectrum of [15+H]<sup>+</sup> at  $m/z$  283.1694

BM\_1mg\_R3 #3555-3567 RT: 14.31-14.35 AV: 6 SB: 6 14.35-14.37 , 14.29-14.31 NL: 1.46E+006  
T: FTMS + c ESI Full lock ms [133.4000-2000.0000]

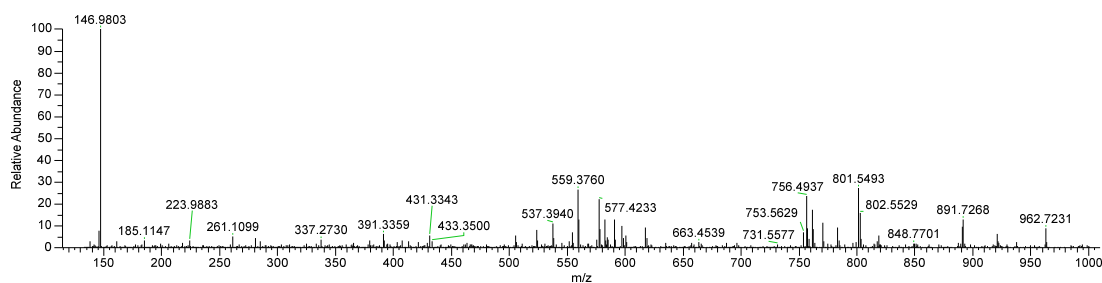

**Figure S45.** ESI<sup>+</sup>-MS spectrum showing ion [16+Na]<sup>+</sup> at  $m/z$  559.3760

BM\_1mg\_R5 #3587 RT: 14.36 AV: 1 NL: 1.01E+006  
T: FTMS + c ESI d Full ms2 559.3761@hcd30.00 [50.0000-590.0000]

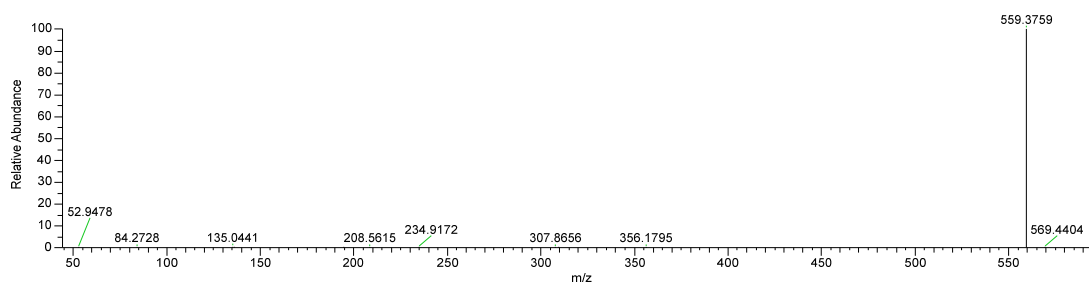

**Figure S46.** Collision-induced fragmentation spectrum of [16+Na]<sup>+</sup> at  $m/z$  559.3760



BM\_1mg\_R3 #3591-3605 RT: 14.43-14.48 AV: 7 SB: 12 14.39-14.43, 14.48-14.52 NL: 8.46E+006  
T: FTMS + c ESI Full lock ms [133.4000-2000.0000]

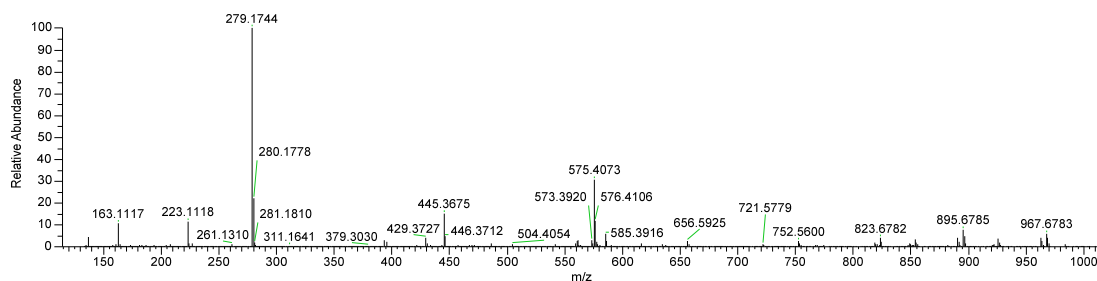

**Figure S47.** ESI<sup>+</sup>-MS spectrum showing ion [17+H]<sup>+</sup> at  $m/z$  279.1744

BM\_1mg\_R5 #3611 RT: 14.44 AV: 1 NL: 1.01E+006  
T: FTMS + c ESI d Full ms2 279.1744@hcd30.00 [50.0000-300.0000]

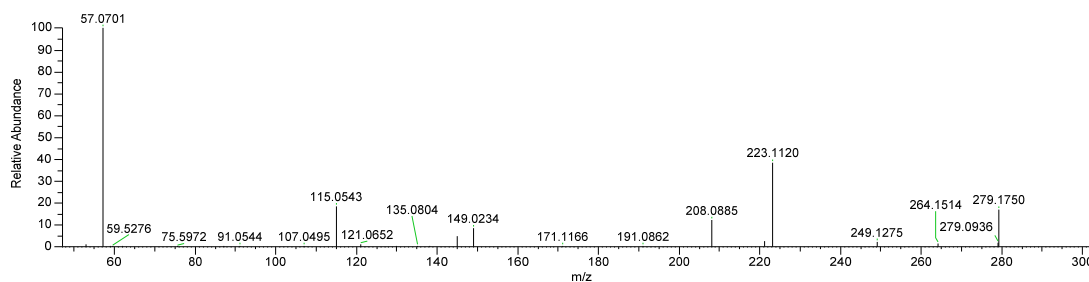

**Figure S48.** Collision-induced fragmentation spectrum of [17+H]<sup>+</sup> at  $m/z$  279.1744

**Table S2.** Compared ESI<sup>+</sup>-MS response of [BM+H]<sup>+</sup> and [7+Na]<sup>+</sup> ions, full data

|                                          | BM                                  | C16:0-dihydroBM     |
|------------------------------------------|-------------------------------------|---------------------|
| Ion                                      | [M+H] <sup>+</sup> , major tautomer | [M+Na] <sup>+</sup> |
| $m/z$                                    | 311.1642                            | 573.3914            |
| Initial mass (mg)                        | 2.8                                 | 2.1                 |
| Relative mass                            | 1                                   | 0.75                |
| Concentration in S2 (μg/mL)              | 14.7                                | 11.1                |
| Area in S2                               | 6.52E+09                            | 4.96E+09            |
| Relative response in MS at ~ 12 μg/mL    | 1                                   | <b>1.02</b>         |
| Concentration in S3 (μg/mL)              | 1.47                                | 1.11                |
| Area in S3                               | 5.62E+08                            | 1.22E+09            |
| Relative response in MS at ~ 1.2 μg/mL   | 1                                   | <b>2.90</b>         |
| Concentration in S4 (μg/mL)              | 0.147                               | 0.111               |
| Area in S4                               | 5.36E+07                            | 1.74E+08            |
| Relative response in MS at ~ 0.12 μg/mL  | 1                                   | <b>4.33</b>         |
| Concentration in S5 (μg/mL)              | 0.0147                              | 0.0111              |
| Area in S4                               | 7.49E+06                            | 1.79E+07            |
| Relative response in MS at ~ 0.012 μg/mL | 1                                   | <b>3.18</b>         |

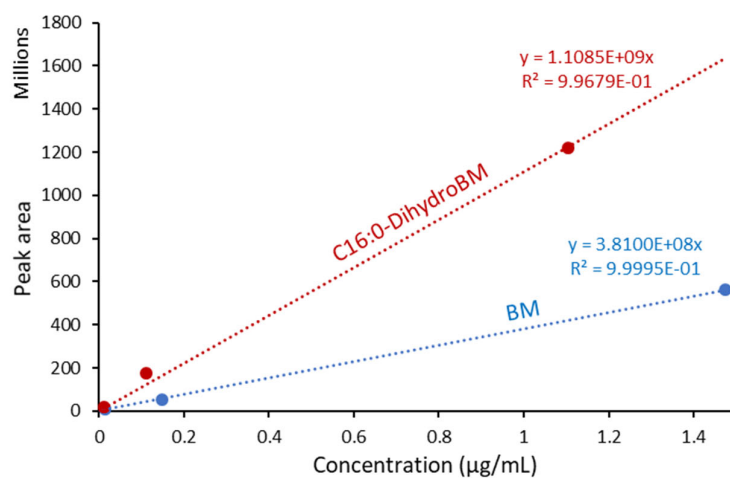

**Figure S49.** Compared ESI<sup>+</sup>-MS response of [BM+H]<sup>+</sup> and [7+Na]<sup>+</sup> ions in the range of concentration for which the response is linear

**Table S3.** Extracted ion chromatogram peak areas for compounds **1-11** in coral exposed to BM (data provided by Compound Discoverer), corrected peak areas to report on mass relative proportions, and relative corrected peak areas

|                                                                                      | <b>[BM]<br/>(µg/L)</b> | <b>Cmpd. #</b> |          |          |          |          |          |          |          |          |           |           | <b>Total<br/>2-11</b> |
|--------------------------------------------------------------------------------------|------------------------|----------------|----------|----------|----------|----------|----------|----------|----------|----------|-----------|-----------|-----------------------|
|                                                                                      |                        | <b>1 (BM)</b>  | <b>2</b> | <b>3</b> | <b>4</b> | <b>5</b> | <b>6</b> | <b>7</b> | <b>8</b> | <b>9</b> | <b>10</b> | <b>11</b> |                       |
| Peak area in coral exposed to BM                                                     | <b>5</b>               | 26138          | 2610     | 3311     | 2736     | 2217     | 2778     | 52070    | 20102    | 2508     | 4270      | 5460      | <b>98063</b>          |
|                                                                                      | <b>50</b>              | 14927          | 5450     | 3825     | 8771     | 20132    | 6028     | 429584   | 13318    | 4464     | 32055     | 11363     | <b>534990</b>         |
|                                                                                      | <b>300</b>             | 60696          | 98042    | 81898    | 182842   | 140004   | 63314    | 4423157  | 50338    | 85529    | 450488    | 338275    | <b>5913886</b>        |
|                                                                                      | <b>1000</b>            | 434362         | 224511   | 440193   | 584738   | 592647   | 334674   | 16668663 | 342890   | 415686   | 1154072   | 1035388   | <b>21793462</b>       |
| Corrected peak area in coral exposed to BM (For compounds <b>2-11</b> , Peak area/3) | <b>5</b>               | 26138          | 870      | 1104     | 912      | 739      | 926      | 17357    | 6701     | 836      | 1423      | 1820      | <b>32688</b>          |
|                                                                                      | <b>50</b>              | 14927          | 1817     | 1275     | 2924     | 6711     | 2009     | 143195   | 4439     | 1488     | 10685     | 3788      | <b>178330</b>         |
|                                                                                      | <b>300</b>             | 60696          | 32681    | 27299    | 60947    | 46668    | 21105    | 1474386  | 16779    | 28510    | 150163    | 112758    | <b>1971295</b>        |
|                                                                                      | <b>1000</b>            | 434362         | 74837    | 146731   | 194913   | 197549   | 111558   | 5556221  | 114297   | 138562   | 384691    | 345129    | <b>7264487</b>        |
| Relative corrected peak area (in relation to BM peak area) in coral exposed to BM    | <b>5</b>               |                | 0.03     | 0.04     | 0.03     | 0.03     | 0.04     | 0.66     | 0.26     | 0.03     | 0.05      | 0.07      | <b>1.3</b>            |
|                                                                                      | <b>50</b>              |                | 0.12     | 0.09     | 0.20     | 0.45     | 0.13     | 9.59     | 0.30     | 0.10     | 0.72      | 0.25      | <b>12</b>             |
|                                                                                      | <b>300</b>             |                | 0.54     | 0.45     | 1.00     | 0.77     | 0.35     | 24.29    | 0.28     | 0.47     | 2.47      | 1.86      | <b>32</b>             |
|                                                                                      | <b>1000</b>            |                | 0.17     | 0.34     | 0.45     | 0.45     | 0.26     | 12.79    | 0.26     | 0.32     | 0.89      | 0.79      | <b>17</b>             |

BM\_1mg\_R3 #3046-3063 RT: 12.58-12.64 AV: 9 SB: 14 12.56-12.58 , 12.64-12.70 NL: 2.02E+007  
T: FTMS + c ESI Full lock ms [133.4000-2000.0000]

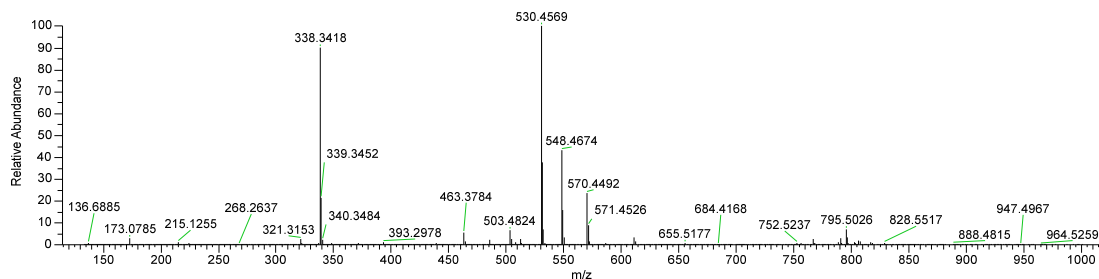

**Figure S50.** ESI<sup>+</sup>-MS spectrum showing ion [18+H]<sup>+</sup> at  $m/z$  548.4674

BM\_1mg\_R3 #3051 RT: 12.60 AV: 1 NL: 2.86E+005  
T: FTMS + c ESI d Full ms2 548.4675@hcd30.00 [50.0000-575.0000]

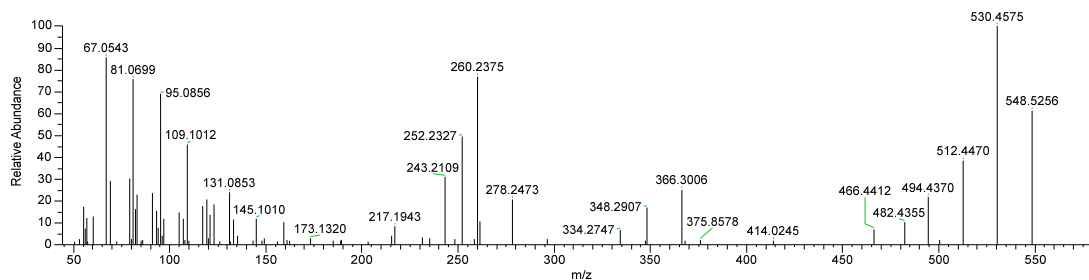

**Figure S51.** Collision-induced fragmentation spectrum of [18+H]<sup>+</sup> at  $m/z$  548.4674

BM\_1mg\_R3 #3184-3205 RT: 13.05-13.12 AV: 11 SB: 25 12.99-13.04 , 13.11-13.22 NL: 3.44E+007  
T: FTMS + c ESI Full lock ms [133.4000-2000.0000]

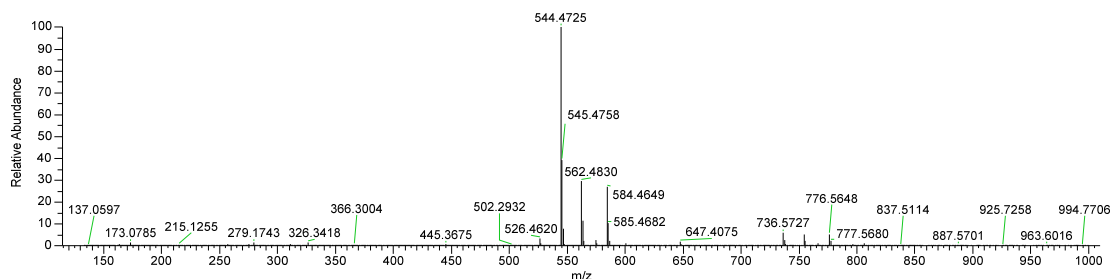

**Figure S52.** ESI<sup>+</sup>-MS spectrum showing ion [19+H]<sup>+</sup> at  $m/z$  562.4830

BM\_1mg\_R3 #3187 RT: 13.06 AV: 1 NL: 3.34E+005  
T: FTMS + c ESI d Full ms2 562.4830@hcd30.00 [50.0000-590.0000]

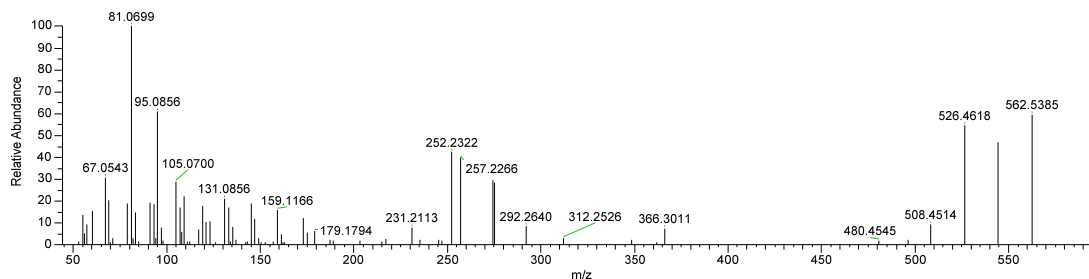

**Figure S53.** Collision-induced fragmentation spectrum of [19+H]<sup>+</sup> at  $m/z$  562.4830

BM\_1mg\_R3 #3273-3290 RT: 13.35-13.41 AV: 9 SB: 13 13.29-13.34, 13.41-13.45 NL: 1.29E+007  
T: FTMS + c ESI Full lock ms [133.4000-2000.0000]

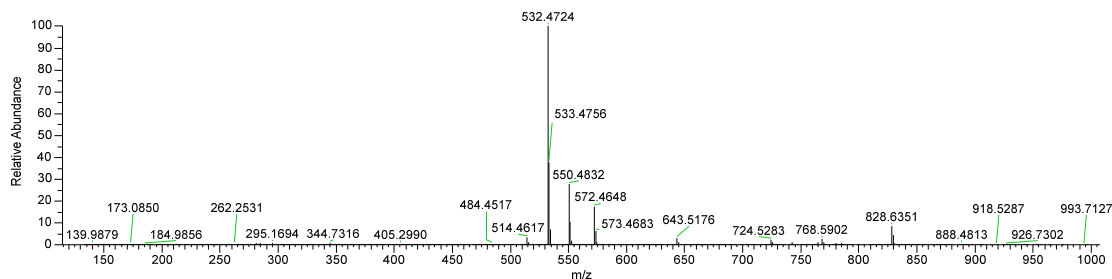

**Figure S54.** ESI<sup>+</sup>-MS spectrum showing ion [20+H]<sup>+</sup> at  $m/z$  550.4832

BM\_1mg\_R3 #3279 RT: 13.37 AV: 1 NL: 3.64E+005  
T: FTMS + c ESI d Full ms2 550.4830@hcd30.00 [50.0000-580.0000]

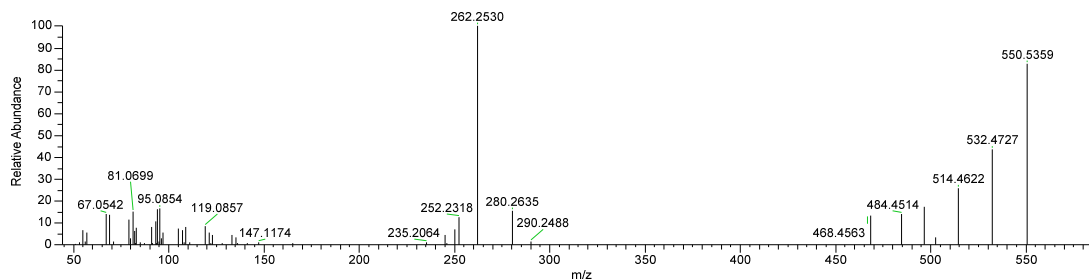

**Figure S55.** Collision-induced fragmentation spectrum of [20+H]<sup>+</sup> at  $m/z$  550.4832

BM\_1mg\_R3 #1909-1923 RT: 8.72-8.77 AV: 7 SB: 18 8.67-8.72, 8.77-8.84 NL: 4.12E+006  
T: FTMS + c ESI Full lock ms [133.4000-2000.0000]

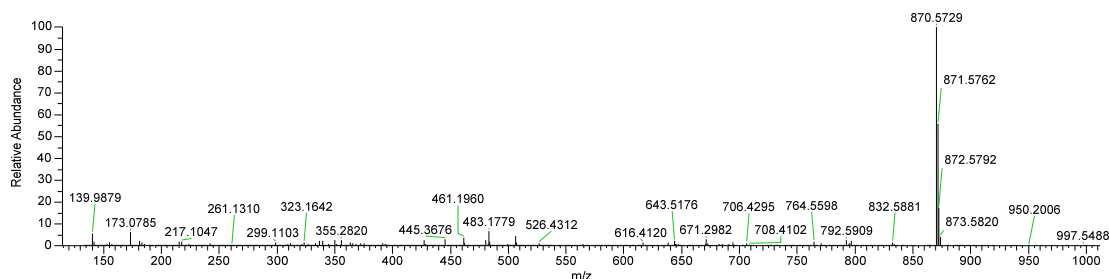

**Figure S56.** ESI<sup>+</sup>-MS spectrum showing ion [21+H]<sup>+</sup> at  $m/z$  870.5731

BM\_1mg\_R3 #1915 RT: 8.74 AV: 1 NL: 2.04E+006  
T: FTMS + c ESI d Full ms2 870.5729@hcd30.00 [60.3333-905.0000]

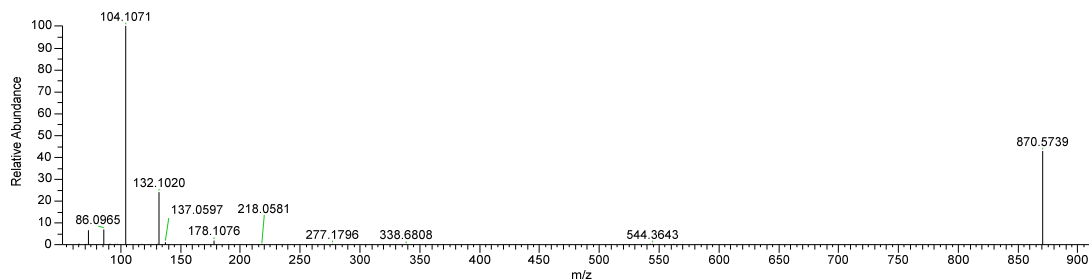

**Figure S57.** Collision-induced fragmentation spectrum of [21+H]<sup>+</sup> at  $m/z$  870.5731

BM\_1mg\_R3 #2096 RT: 9.37 AV: 1 SB: 8 9.33-9.36 , 9.40-9.42 NL: 2.15E+006  
T: FTMS + c ESI Full lock ms [133.4000-2000.0000]

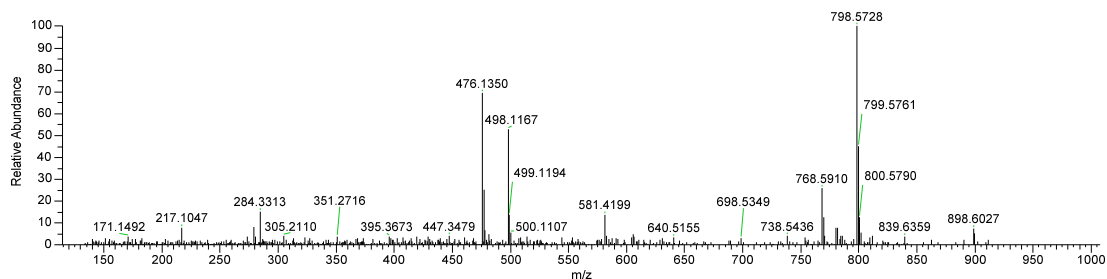

**Figure S58.** ESI<sup>+</sup>-MS spectrum showing ion [22+H]<sup>+</sup> at  $m/z$  798.5731

BM\_1mg\_R3 #2093 RT: 9.36 AV: 1 NL: 1.54E+006  
T: FTMS + c ESI d Full ms2 798.5731@hcd30.00 [55.3333-830.0000]

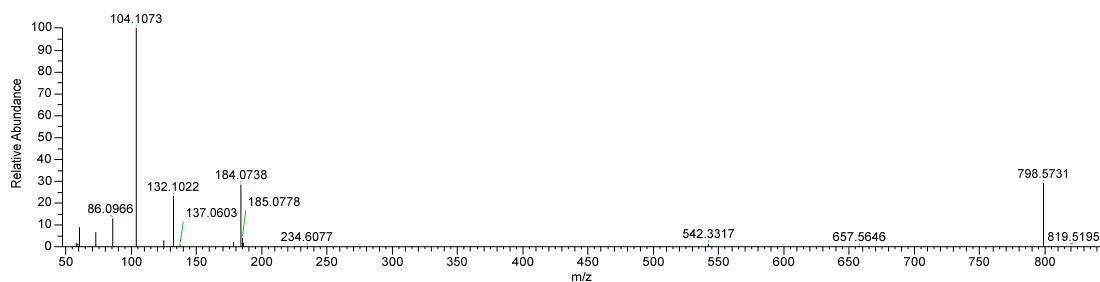

**Figure S59.** Collision-induced fragmentation spectrum of [22+H]<sup>+</sup> at  $m/z$  798.5731

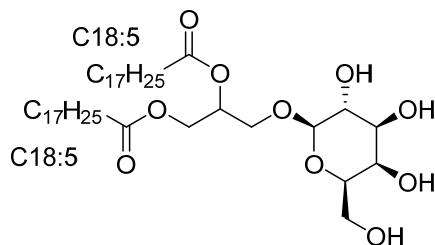

**Figure S60.** Proposed structure of compound **23**

BM\_1mg\_R3 #2544-2561 RT: 10.9-10.96 AV: 9 SB: 17 10.85-10.89 , 10.97-11.04 NL: 3.04E+006  
T: FTMS + c ESI Full lock ms [133.4000-2000.0000]

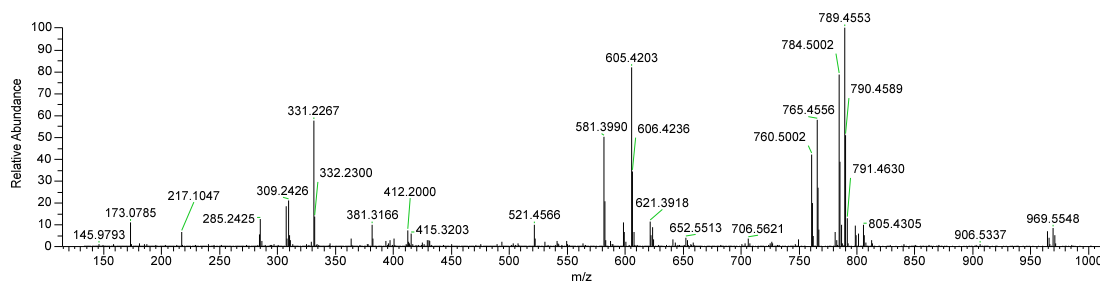

**Figure S61.** ESI<sup>+</sup>-MS spectrum showing ion [23+Na]<sup>+</sup> at  $m/z$  789.4553

BM\_1mg\_R3 #2553 RT: 10.93 AV: 1 NL: 3.67E+005  
T: FTMS + c ESI d Full ms2 789.4554@hcd30.00 [55.0000-825.0000]

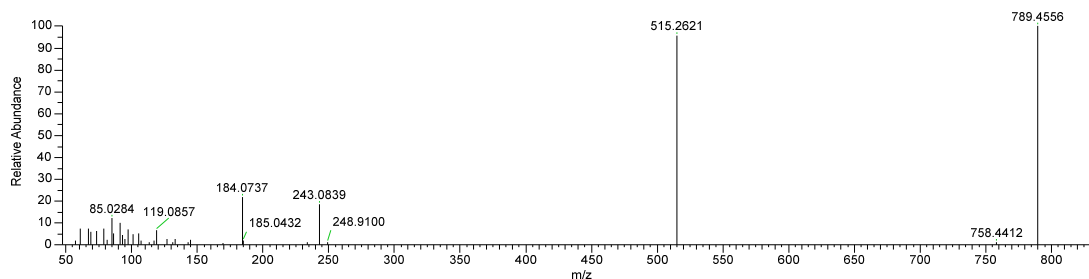

**Figure S62.** Collision-induced fragmentation spectrum of  $[23+Na]^+$  at  $m/z$  789.4553

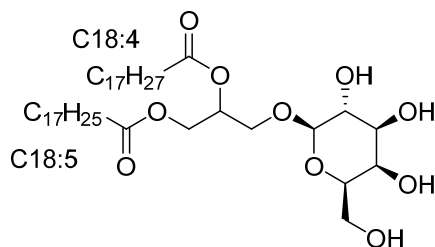

**Figure S63.** Proposed structure of compound **24**

BM\_1mg\_R3 #2633 RT: 11.21 AV: 1 NL: 1.46E+008  
T: FTMS + c ESI Full lock ms [133.4000-2000.0000]

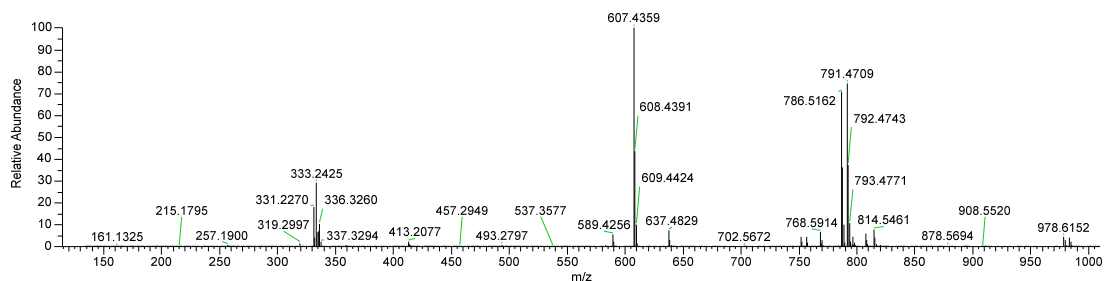

**Figure S64.** ESI+-MS spectrum showing ion  $[24+Na]^+$  at  $m/z$  791.4709

BM\_1mg\_R3 #2633 RT: 11.21 AV: 1 NL: 2.47E+006  
T: FTMS + c ESI d Full ms2 791.4711@hcd30.00 [55.0000-825.0000]

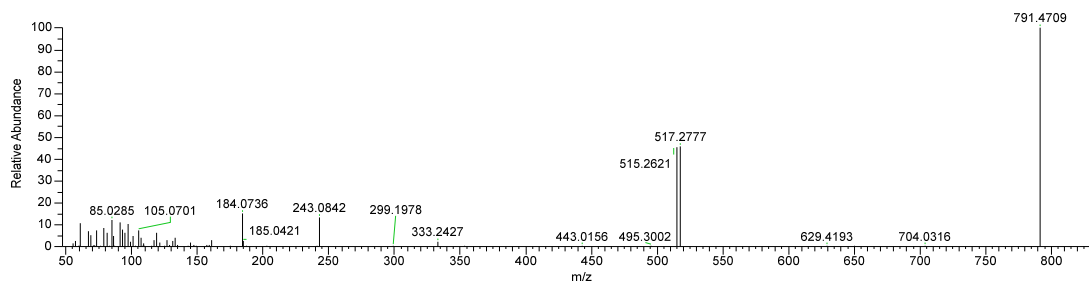

**Figure S65.** Collision-induced fragmentation spectrum of  $[24+Na]^+$  at  $m/z$  791.4709

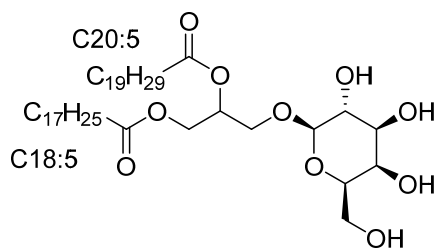

**Figure S66.** Proposed structure of compound **25**

BM\_1mg\_R3 #2753-2771 RT: 11.61-11.67 AV: 9 SB: 53 11.53-11.59, 11.69-11.97 NL: 1.25E+008  
T: FTMS + c ESI Full lock ms [133.4000-2000.0000]

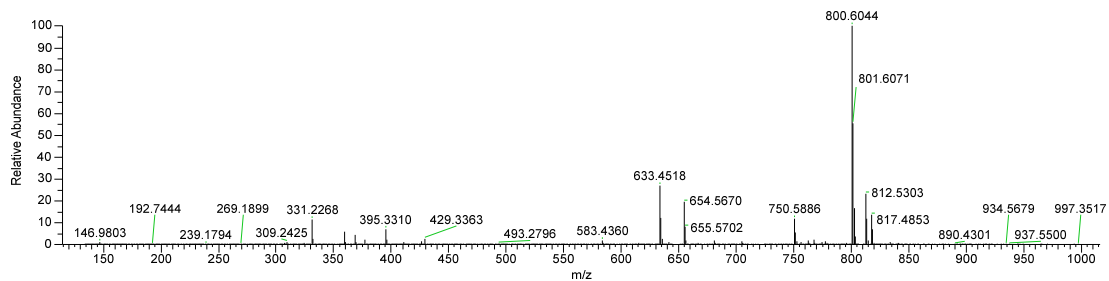

**Figure S67.** ESI<sup>+</sup>-MS spectrum showing ion  $[25+Na]^+$  at  $m/z$  817.4853

BM\_1mg\_R3 #2769 RT: 11.66 AV: 1 NL: 2.60E+006  
T: FTMS + c ESI d Full ms2 817.4851@hcd30.00 [56.6667-850.0000]

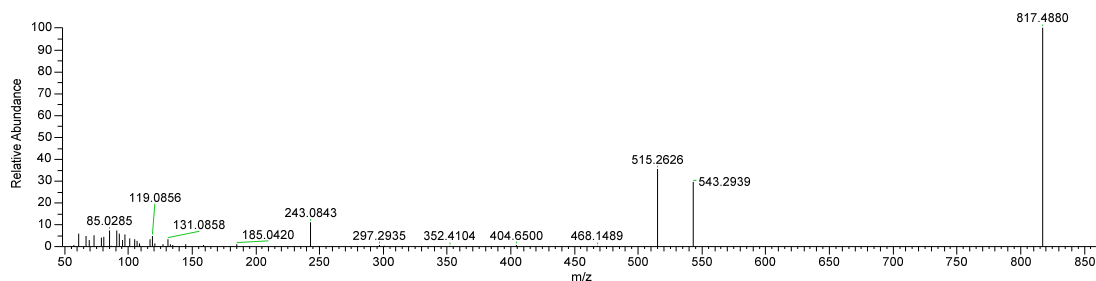

**Figure S68.** Collision-induced fragmentation spectrum of  $[25+Na]^+$  at  $m/z$  817.4866

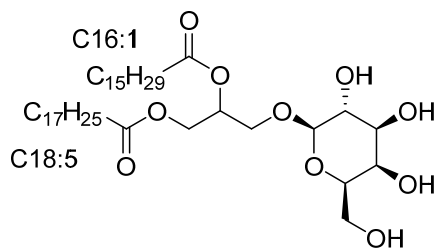

**Figure S69.** Proposed structure of compound **26**



BM\_1mg\_R3 #2955-2977 RT: 12.28-12.35 AV: 11 SB: 16 12.23-12.28 , 12.35-12.39 NL: 1.28E+007  
T: FTMS + c ESI Full lock ms [133.4000-2000.0000]

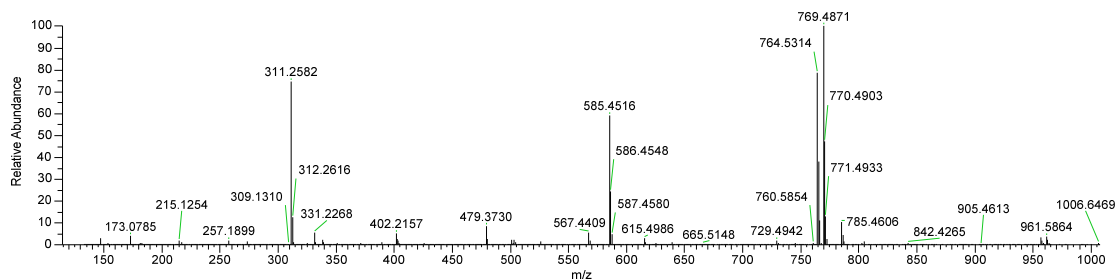

**Figure S70.** ESI<sup>+</sup>-MS spectrum showing ion [26+Na]<sup>+</sup> at *m/z* 769.4871

BM\_1mg\_R3 #2961 RT: 12.30 AV: 1 NL: 3.15E+006  
T: FTMS + c ESI d ms2 769.4872@hcd30.00 [53.6667-805.0000]

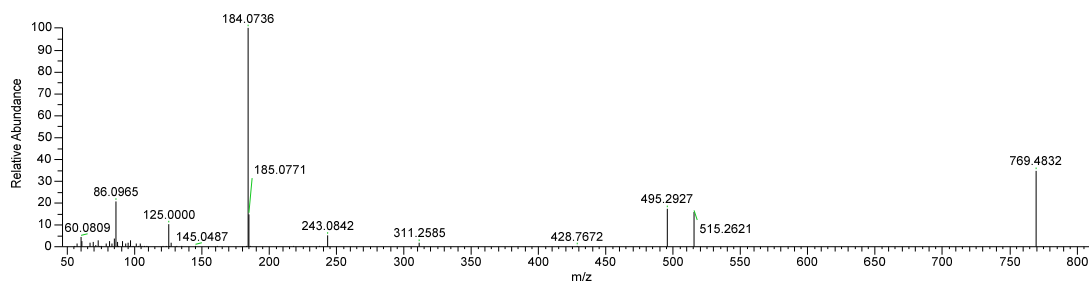

**Figure S71.** Collision-induced fragmentation spectrum of [26+Na]<sup>+</sup> at *m/z* 769.4871

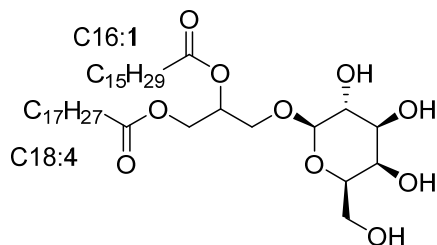

**Figure S72.** Proposed structure of compound **27**

BM\_1mg\_R3 #3063-3078 RT: 12.64-12.69 AV: 8 SB: 16 12.57-12.63 , 12.69-12.73 NL: 8.77E+006  
T: FTMS + c ESI Full lock ms [133.4000-2000.0000]

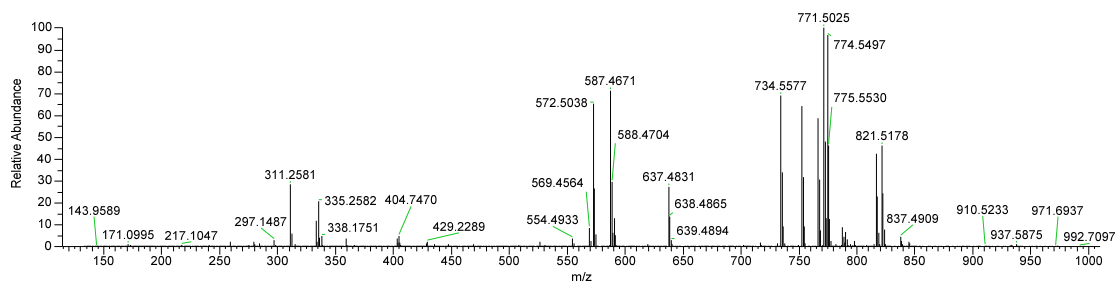

**Figure S73.** ESI<sup>+</sup>-MS spectrum showing ion [27+Na]<sup>+</sup> at *m/z* 771.5025

BM\_1mg\_R3 #3067 RT: 12.65 AV: 1 NL: 5.65E+005  
T: FTMS + c ESI d Full ms2 771.5024@hcd30.00 [53.6667-805.0000]

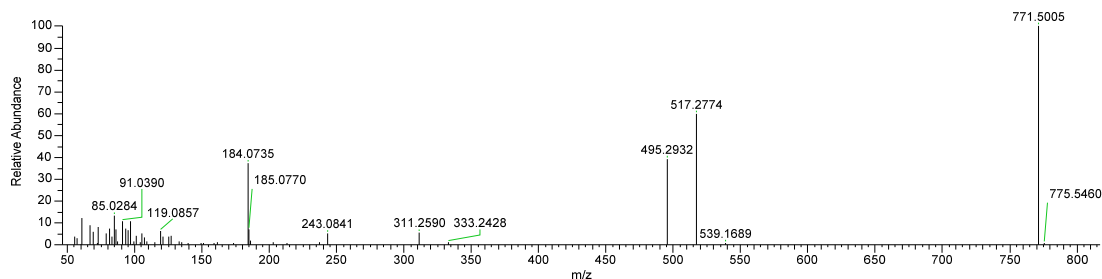

**Figure S74.** Collision-induced fragmentation spectrum of  $[27+Na]^+$  at  $m/z$  771.5025

BM\_1mg\_R3 #2602-2620 RT: 11.1-11.16 AV: 10 SB: 12 11.06-11.10, 11.17-11.20 NL: 3.22E+006  
T: FTMS + c ESI Full lock ms [133.4000-2000.0000]

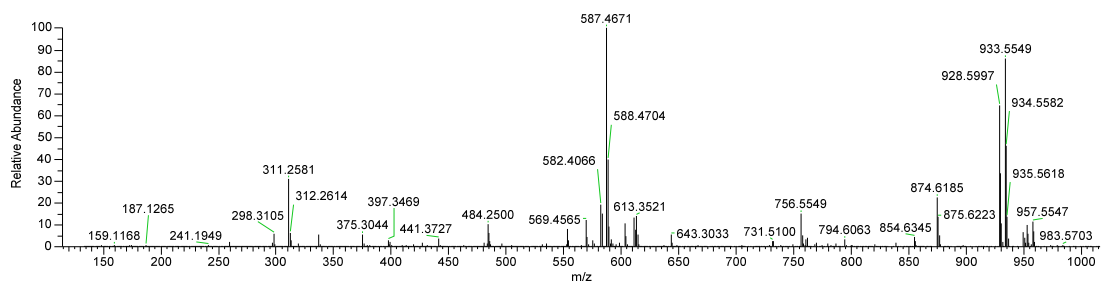

**Figure S75.** ESI+-MS spectrum showing ion  $[28+H]^+$  at  $m/z$  613.3521

Corail\_BM1000\_R5\_17-01-2019\_FullIMS-PRM\_2 #1847 RT: 10.50 AV: 1 NL: 3.18E+004  
T: FTMS + p ESI Full ms2 613.3524@hcd30.00 [50.0000-645.0000]

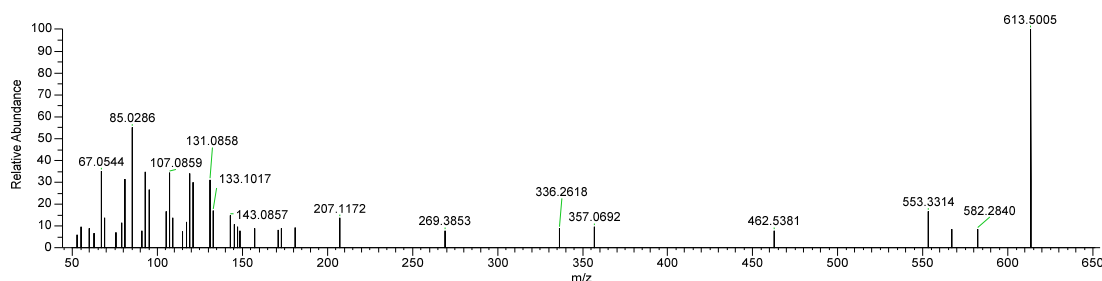

**Figure S76.** Collision-induced fragmentation spectrum of  $[28+H]^+$  at  $m/z$  613.3521

BM\_1mg\_R3 #2653-2668 RT: 11.27-11.32 AV: 8 SB: 29 11.22-11.27, 11.32-11.46 NL: 9.90E+006  
T: FTMS + c ESI Full lock ms [133.4000-2000.0000]

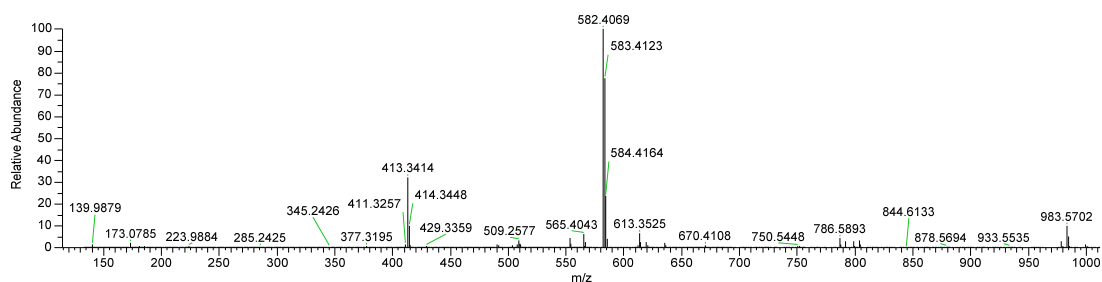

**Figure S77.** ESI+-MS spectrum showing ion  $[29+H]^+$  at  $m/z$  613.3525

BM\_1mg\_R4 #2715 RT: 11.37 AV: 1 NL: 1.90E+005  
T: FTMS + c ESI d Full ms2 613.4830@hcd30.00 [50.0000-645.0000]

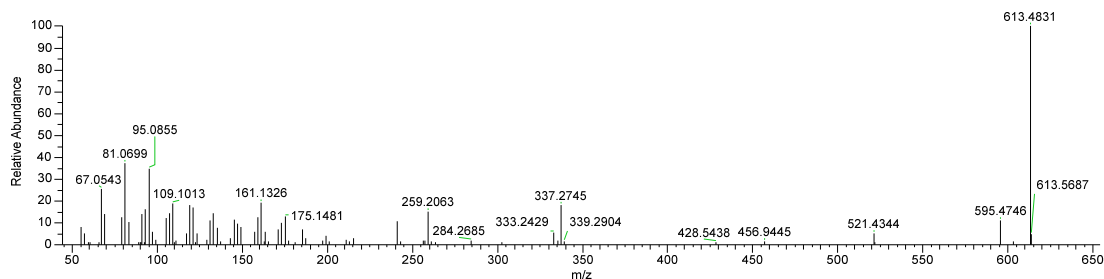

**Figure S78.** Collision-induced fragmentation spectrum of  $[29+H]^+$  at  $m/z$  613.3521

BM\_1mg\_R3 #2931-2952 RT: 12.2-12.27 AV: 11 SB: 19 12.27-12.33 12.14-12.20 NL: 1.60E7  
T: FTMS + c ESI Full lock ms [133.4000-2000.0000]

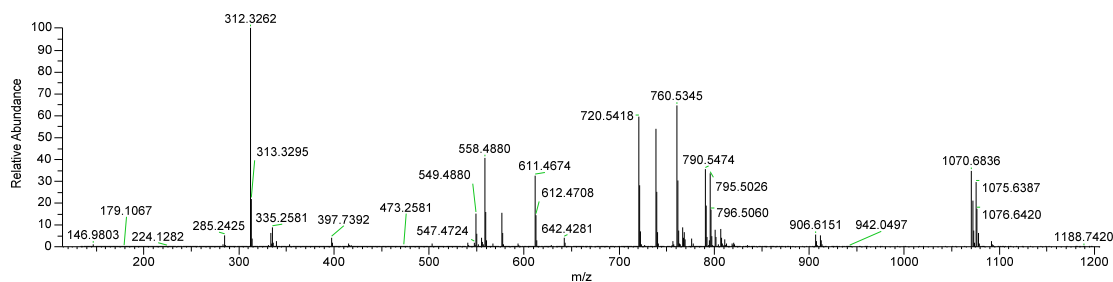

**Figure S79.** ESI+-MS spectrum showing ion  $[30+NH_4]^+$  at  $m/z$  1070.6836

BM\_1mg\_R1 #2948 RT: 12.22 AV: 1 NL: 1.28E+006  
T: FTMS + c ESI d Full ms2 1070.6836@hcd30.00 [74.0000-1110.0000]

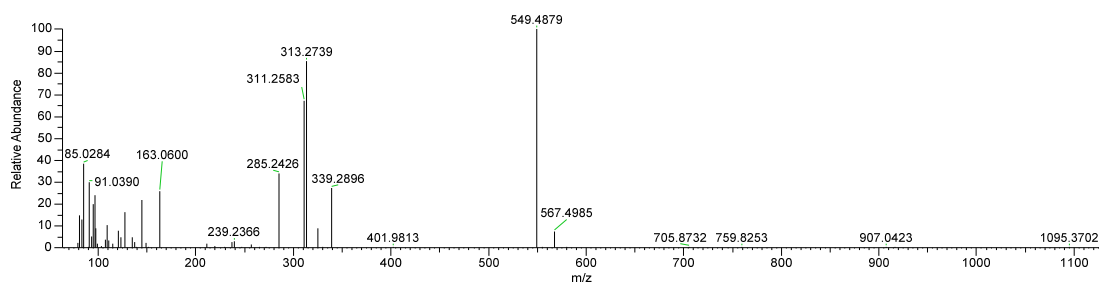

**Figure S80.** Collision-induced fragmentation spectrum of  $[30+NH_4]^+$  at  $m/z$  1070.6836
